1 **Antigenic mapping of the hemagglutinin of the H9 subtype influenza A viruses using sera**  
2 **from Japanese quail (*Coturnix c. japonica*).**

3 Silvia Carnaccini<sup>a\*</sup>, C. Joaquín Cáceres<sup>a\*</sup>, L. Claire Gay<sup>a</sup>, Lucas M. Ferreri<sup>a</sup>, Eugene Skepner<sup>b</sup>,  
4 David F. Burke<sup>c</sup>, Ian H. Brown<sup>d</sup>, Ginger Geiger<sup>a</sup>, Adebimpe Obadan<sup>a</sup>, Daniela S. Rajao<sup>a</sup>, Nicola  
5 S. Lewis<sup>e</sup>, Daniel R. Perez<sup>a#</sup>.

6 a. Department of Population Health, College of Veterinary Medicine, University of Georgia,  
7 Athens, Georgia, USA.

8 b. Center for Pathogen Evolution, University of Cambridge, Cambridge, United Kingdom.

9 c. European Molecular Biology Laboratory, European Bioinformatics Institute (EMBL-EBI),  
10 Wellcome Genome Campus, Hinxton, United Kingdom.

11 d. Animal and Plant Health Agency (APHA) - Weybridge, United Kingdom

12 e. World Influenza Centre, The Francis Crick Institute, London, United Kingdom

13 \*These authors contributed equally to this work.

14 **Abbreviations:** av=avian, dk=duck, ck=chicken, gf=guinea fowl, ty=turkey, ph=pheasant,  
15 qa=quail, ma=mallard, rt= ruddy turnstone, sh=shorebird. AR=Arkansas, DE=Delaware,  
16 NJ=New Jersey, WI=Wisconsin. Bei=Beijing, Guan=Guangdong, HK=Hong Kong, Hun=Hunan,  
17 Sic=Sichuan, Shi=Shijiazhuang. Afg=Afghanistan, Ban=Bangladesh, ENG=England,  
18 Fin=Finland, Ger=Germany, Isr=Israel, Lib=Libya, NL=Netherlands, Pak=Pakistan,  
19 Rol=Republic of Ireland, Saudi A=Saudia Arabia, S Korea=South Korea, Tun=Tunisia,  
20 UAE=United Arab Emirates, USA=United States of America.\*These authors contributed equally  
21 to this work.

22 Corresponding Author: Daniel R. Perez ([dperez1@uga.edu](mailto:dperez1@uga.edu)). Department of Population Health,  
23 College of Veterinary Medicine, University of Georgia. 953 College Station Rd., Athens, GA,  
24 USA 30602. Tel: +1 (706) 542-5506.

25 *Running title: Antigenic analysis of the H9 subtype hemagglutinin*

26

27

28

29 **ABSTRACT**

30 Influenza A viruses (FLUAV) of the H9N2 subtype are zoonotic pathogens that cause  
31 significant economic damage to the poultry industry. Vaccination to prevent and control H9N2  
32 infections in poultry is widely employed in the Middle East and Asia. We used phylogenetics and  
33 antigenic analysis to study the antigenic properties of the H9 hemagglutinin (HA) using sera  
34 produced in Japanese quail (*Coturnix c. japonica*). Consensus HA1 sequences were generated  
35 to capture antigenic diversity among isolates. We constructed chimeric H9N2 viruses containing  
36 the HA1 of each consensus sequence on a constant isogenic backbone. The resulting viruses  
37 were used to generate antisera from quail, a common and significant minor poultry species  
38 whose anti-HA response profiles remain poorly defined. Antigenic maps were generated by  
39 plotting the cross-hemagglutination inhibition (HI) data from the panel of quail sera against the  
40 chimeric constructs and 51 H9 field isolates. The chimeric antigens were divided into four  
41 different antigenic profiles (cyan, blue, orange, and red). Site-directed mutagenesis analysis  
42 showed 9 amino acid positions of antigenic relevance. Substitutions at amino acid positions  
43 149, 150, and 180 (H9 HA numbering) had relatively significant impact on HI activity using quail  
44 sera. Substitutions E180A and R131K/E180A led to the most significant antigenic change  
45 transitions. This study provides insights into the antigenic profile of H9 FLUAVs, with important  
46 implications for understanding antigenic drift and improving vaccine development for use in  
47 minor poultry species.

48 Words abstract: 229

49 **IMPORTANCE**

50 Determining the relevant amino acids involved in antigenic drift on the surface protein  
51 hemagglutinin (HA) is critical to understand influenza virus evolution and efficient assessment of  
52 vaccine strains relative to current circulating strains. We used antigenic cartography to generate  
53 an antigenic map of the H9 HA using sera produced in one of the most relevant minor poultry  
54 species, Japanese quail. Key antigenic positions were identified and tested to confirm their  
55 impact on the antigenic profile. This work provides a better understanding of the antigenic  
56 diversity of the H9 HA as it relates to reactivity to quail sera and will facilitate a rational approach  
57 for selecting more efficacious vaccines against poultry-origin H9 influenza viruses in minor  
58 poultry species.

59 Words : 117

## 60 INTRODUCTION

61 Influenza A virus (FLUAV) of the H9N2 subtype are enzootic in poultry in Asia, the  
62 Middle East, and parts of Africa, where they cause significant economic losses to the poultry  
63 industry due to high morbidity and mortality of poultry flocks (1, 2). More importantly, Eurasian-  
64 origin H9N2 FLUAVs are zoonotic viruses and they have provided the internal gene  
65 constellation to more virulent zoonotic strains, notably the H5N1 Guangdong lineage, the Asian-  
66 lineage H7N9, H10N8 and H3N8 FLUAVs (3-5). The World Health Organization (WHO) has  
67 placed H9N2 FLUAVs among those with pandemic concern. Recently, we proposed a  
68 consistent numerical nomenclature for the HA of the H9 subtype, similar to the system adopted  
69 for the H5 subtype (2). Initially, two major geographically distinct H9 lineages were identified: the  
70 American (h9.1) and the Eurasian (h9.2) lineages (2). The continuous circulation of H9 FLUAVs  
71 in poultry in Asia has led to significant evolution and, consequently, phylogeographic diversity  
72 among the Eurasian lineage viruses leading to several sub-lineages and sub-sub-lineages.  
73 Currently, Eurasian H9 HA sequences fall into three major sub-lineages: h9.2 (previously  
74 referred to as Y439, prototype dk/HK/Y439/1997), h9.3 (BJ94, prototype ck/Bei/1/94), and h9.4  
75 (G1, prototype qa/HK/G1/1997). The H9.2 sub-lineage can be divided further into several sub-  
76 sub-lineages, including h9.2.1 and h9.2.2, which are mostly found in wild birds, and h9.2.3, also  
77 known as Korean-strict and found in poultry in South Korea. The h9.3 sub-lineage is particularly  
78 prominent in China and Southeast Asia, with the presence of at least 9 sub-sub-lineages,  
79 h9.3.1-h9.3.9. Previous studies suggested dividing the h9.4 sub-lineage into Eastern and  
80 Western sub-sub-lineages based on their respective geographic prevalence (2). However, due  
81 to early indications of incongruent geographic boundaries among the Eastern and Western h9.4  
82 strains, we proposed an alternative numerical nomenclature, h9.4.1 and h9.4.2, respectively (3,  
83 4).

84 To prevent and control H9N2 virus infections in poultry, several countries in Asia and  
85 Middle East have resorted to vaccination programs (5-11). Antigenic drift of H9 FLUAVs is  
86 readily observed in the field, likely a combination of natural evolution and vaccine use (5-11).  
87 Near and around the receptor binding site, the globular head HA1 portion of the H9 HA contains  
88 two partially overlapping antigenic sites. These sites have been defined previously using mouse  
89 monoclonal antibodies (mAbs) and are known as sites I and II or, more recently, as sites H9-A  
90 and H9-B, respectively (12-16). Site H9-A is immunodominant compared to site H9-B (13, 17). A  
91 limited set of the most prominent poultry-adapted Eurasian lineages from specific regions have  
92 been examined antigenically (12-14, 18-20). Most antigenic analyses of H9N2 viruses have  
93 been performed using chicken sera and, to a lesser extent, ferret sera, but not with sera from

94 minor poultry species such as quail. Japanese quails have been suggested as key players in  
95 the genesis of influenza viruses with respiratory tract tropism (21, 22). Quail show wide  
96 distribution in the respiratory tract of both avian-like (SA $\alpha$ 2.3) and human-like (SA $\alpha$ 2.6) sialic  
97 acid receptors, which may have contributed to the emergence of the poultry adapted H9N2  
98 strains with human-like receptor preference (23, 24). Anti-H9 sera have been raised by different  
99 approaches and regimes, which act as confounding factors to assess antigenicity faithfully (17,  
100 25-28). Immunization approaches have included either live virus challenge or most typically  
101 inactivated/adjuvanted viruses in either single or prime and boost infection or vaccination.  
102 Despite the absence of a standardized approach for sera production, these analyses have  
103 shown some significant clues about the antigenic makeup of the H9 HA. Combined with studies  
104 using mouse mAbs, a cluster of amino acids has been shown to affect the antigenic profile of  
105 the HA, namely those at positions 72, 74, 121, 131, 135, 150, 180, 183, 195, 198, 216, 217,  
106 249, 264, 276, 288, and 306 (H9 numbering throughout the manuscript)(17, 26, 27, 29, 30).  
107 Further analyses on the contributions of each of these and alternative positions to  
108 antigenicity/receptor binding avidity are discussed later in the context of this report's findings.

109 To broaden the understanding of the antigenic diversity of HAs of H9 FLUAVs, we  
110 included strains from the American and Eurasian lineages. Starting from an initial phylogenetic  
111 analysis of nucleotide sequences corresponding to the HA1 region of the HA, we identified 18  
112 clades utilizing sequence information of strains from 1966 to 2020. Analyses of these clades led  
113 to the selection of 10 consensus sequences that largely embodied the amino acid diversity  
114 within each H9 lineage/sub-lineage/sub-sub-lineage. The 10 HA1 sequences were used to  
115 generate chimeric H9 HA gene segments carrying a constant HA2 portion derived from the  
116 prototypic strain gf/HK/WF10/1999 (H9N2) (WF10) (31, 32). The chimeric HA constructs were  
117 subsequently used for reverse genetics. To better understand the H9 HA antigenic make-up in  
118 the context of neutralizing responses in minor poultry, Japanese quails were challenged with the  
119 chimeric H9 HA viruses. Anti-H9 quail sera were used to perform hemagglutination inhibition  
120 (HI) assay and antigenic cartography (15, 33). These analyses showed H9 HA antigens  
121 positioned in 4 antigenic clusters in the antigenic map, with additional outliers. Viruses carrying  
122 amino acid substitutions at relevant antigenic positions were generated to explain cluster  
123 transitions. These results provide new insights into the antigenic evolution of H9N2 influenza  
124 viruses and offer new opportunities to improve vaccine development.

125 Words: 858

126

## 127 RESULTS

128 **Phylogenetic analysis, consensus sequences, and antigenically relevant amino acids on**  
129 **H9 HA.** Using the H9 HA1 region a maximum likelihood phylogenetic tree was established  
130 based on nucleotide sequences from isolates between 1966 to 2016 and then updated with  
131 sequences up to 2020. The phylogenetic analysis allowed the identification of different clades  
132 (h9.1.1 to h9.4.2). Consensus sequences were generated for each clade, n=10 (**Fig 1A**). The %  
133 amino acid identity ranged from 83.1% (h9.2.3 vs. h9.3.9) to 98.4% (h9.3.3 vs. h9.3.4). The  
134 number of amino acid differences in the HA1 region between the consensus sequences and the  
135 HA of the prototypic h9.4.1 strain WF10 were 31 (h9.4.2), 35 (h9.2.4), 36 (h9.3.3), 37 (h9.2.2),  
136 38 (h9.3.4), 39 (h9.1.1 and h9.3.3), 44 (h9.3.7), 47 (h9.2.3), and 48 (h9.3.9), respectively (**Fig**  
137 **1B**). Chimeric HA constructs were used for reverse genetics in the WF10 backbone. In addition  
138 to the wild-type WF10 strain, 8 out of the 10 chimeric HA constructs resulted in viable H9N2  
139 viruses. No virus rescue was obtained for the chimeric HA representing the h9.2.3 and h9.2.4  
140 clades. Analysis of the HA1 portion of the consensus viruses and the closest relative from a  
141 subset of field viruses showed high similarity (**Fig 1B**). For WF10, the closest relative was  
142 A/qa/HK/G1/97 (98.4%); for h9.4.2, A/ck/Pak/47/03 (98.9%); for h9.3.9 and h9.3.7,  
143 A/dk/Hunan/1/2006 (93.3% and 96.5%, respectively); for h9.3.4, A/dk/HK/Y280/97 (96.9%); and  
144 for h9.3.3, A/ck/Sichuan/5/97 (98.5%). The % of identity between h9.2.2 and  
145 A/ml/Fin/Li13384/2010 and h9.1.1 and A/rt/New Jersey/AI11-1946/2011 was 98.6% and 95.5%  
146 respectively.

147 **HI responses against consensus clades viruses in quail.** To generate antisera against the  
148 chimeric HA consensus viruses, we chose Japanese quail (*Coturnix c. japonica*) as a relevant  
149 minor poultry host of H9 FLUAVs (21, 31). Groups of quail (9 groups, n=6/group) were  
150 inoculated with either of each H9N2 chimeric virus or WF10 wild type (**Fig 2A**). At 14 days post-  
151 inoculation (14 dpi), quail were boosted subcutaneously with inactivated-adjuvanted  
152 preparations of each virus. At 28 dpi, quail were terminally bled, and 2 independent pooled sera  
153 were generated (3 birds per pool). We analyzed the seroconversion to the homologous virus in  
154 inoculated quail by HI assays showing titers between 1280 and 5120 against the homologous  
155 viruses (**Table 1**). The highest homologous HI titers were obtained for h9.3.3 and h9.3.9, with a  
156 titer of 5120 in each case. Similarly, titers of 2560-5120 were observed for h9.3.4, while a titer  
157 of 2560 was obtained for h9.4.2. In the case of h9.3.7 and WF10, titers of 1280-2560 were  
158 observed. The h9.1.1 and h9.2.2 groups were the exception, with HI titers of 80-160 and 40-  
159 160, respectively, which are considerably lower than the other consensus viruses. Taken  
160 together, the homologous HI data shows high levels of neutralizing antibodies against the

161 different consensus viruses, except h9.1.1 and h9.2.2, which elicit poor antibody responses in  
162 the quail model.

163 **Antigenic analysis of H9 HA.** Using the antigenic cartography platform, the cross-HI data  
164 obtained were merged and visualized by generating maps in which the spheres represent  
165 antigens and the squares the sera, distributed into space. Antigenic distances between antigens  
166 in the map are expressed in antigenic units (AU, 1AU corresponds to a 2-fold dilution of  
167 antiserum in the HI assay). Dimensional analysis of the HI dataset led to lower error yield in the  
168 3D maps, though 2D maps were selected for better visualization, given that the relationship  
169 between consensus antigens remained unvaried. The antigens were grouped into 4 different  
170 clusters as described in Material and Methods (**Fig 2B**). We used 3 AU or a  $\geq 8$ -fold loss in  
171 cross-reactivity, as defined for the human seasonal vaccine strain update (WHO  
172 recommendation), as the threshold of significant antigenic difference. The WT WF10 HA  
173 prototypic h9.4.1 antigen (cyan) was 3.4 AU from the h9.4.2 antigen (blue). The h9.3.3, h9.3.4,  
174 h9.3.5, and h9.3.7 antigens (blue) clustered antigenically very close to each other ( $<0.3$  AU) and  
175 with 1.3, 1.6, 1.3 and 1.4 AU from the h9.4.2 blue antigen respectively. The h9.3.9 antigen  
176 (orange) was 4.5 AU from the h9.3.7 consensus (blue), the closest phylogenetic relative, and  
177 5.1 AU from the h9.4.2 blue antigen. The distance between WT WF10 HA prototypic h9.4.1  
178 antigen (cyan) and the h9.3.9 antigen (orange) was 4.1. The h9.1.1 and h9.2.2 consensus  
179 antigens (red) showed relatively close antigenic relationships (2.9 AU from each other), but  
180 distances between h9.1.1 and WF10 (cyan), h9.4.2 (blue), and h9.3.9 (orange) antigens were  
181 4.0, 5.3, and 8.1, respectively. It must be noted that the robustness of positioning of h9.1.1 and  
182 h9.2.2 must be interpreted cautiously due to the relatively low inherent  
183 antigenicity/immunogenicity compared to the rest of the consensus antigens.

184 To better define whether the consensus chimeric H9 HA viruses captured the antigenic profile of  
185 prototypic strains within each clade, the quail sera was used in HI assays using a subset of  
186 closest prototypical field strains available (**Fig 2C and table 2**). The positioning of the prototypic  
187 field antigens relative to the consensus antigens was generally consistent with their position in  
188 the phylogenetic tree. The prototypic A/qa/HK/G1/97 (h9.4.1) antigen was 0.7 AU from the  
189 WF10 h9.4.1 antigen (cyan). Two prototypic strains, A/ck/HK/G9/1997 (G9, h9.3.3-like) and  
190 A/dk/HK/Y280/1997 (Y280, h9.3.4-like), clustered together with the h9.3.3, h9.3.4, h9.3.5,  
191 h9.3.7, and h9.4.2 consensus sequences as part of a blue cluster. The antigenic distances  
192 between G9 and h9.3.3 were 0.4 AU and 1.5 AU between G9 and h9.4.2, suggesting that  
193 genetically similar viruses are also antigenically similar. In the case of Y280, 1.0 AU of  
194 difference was observed from h9.3.4 and 0.7 AU from h9.4.2.



195 We expanded these analyses to 48 additional field strains (**Fig 2D**), bringing the panel to 51  
196 field strains (**Table S1**). The analysis of the other consensus viruses and the antigenic distances  
197 from their closest relatives (**Fig 1B**) revealed similarities between genetic and antigenic  
198 properties except for h9.3.3 and h9.3.9 due to the distances between the consensus viruses  
199 and their respective closest relatives (**Table 2**). Distances between h9.3.3 and  
200 A/ck/Sichuan/5/1997 were 5.7 AU, while distances between h9.3.9 and A/dk/Hunan/1/2066  
201 were 4.9 AU placing consensus viruses and closest relatives in different clusters. The remaining  
202 consensus showed a good correlation with their closest relatives with distances between h9.1.1-  
203 A/rt/New Jersey/A111-1946/2011, h9.2.2-A/ma/Li13384/2010, h9.3.5-A/ck/HK/SF3/99, h9.3.7-  
204 A/dk/Hunan/1/2006 and h9.4.2-A/ck/Pakistan/47/2003 of 0.9 AU, 2.4 AU, 0.5 AU, 1.1 AU, and  
205 0.8 AU respectively. From the 51 field isolates evaluated (**Fig 2D**), 11 fell within the red cluster,  
206 26 within the blue cluster, 4 within the cyan cluster, and none in the orange cluster (**Table 2**).  
207 Due to the low reactivity of the antigenicity/immunogenicity of the red-cluster consensus viruses  
208 (h9.1.1 and h9.2.2) compared to the rest of the consensus antigens, field isolates of the red  
209 cluster were removed from the map (**Fig 2D**). The h9.3.9 antigen was antigenically distinct from  
210 the rest of the h9.3 lineage viruses with AU distances of 4.1 (h9.3.3), 4.3 (h9.3.4), 4.1 (h9.3.5),  
211 and (h9.3.7). Further, none of the field isolates evaluated fell within 3 AU of distance from  
212 h9.3.9. The closest antigen to h9.3.9 was WF10 (cyan, 4.1 AU) (**Table 3**). A/ck/Beijing/8/1998  
213 (h9.3.3), A/ck/Hebei/3/1998 (h9.3.3), A/ck/UAE/H4TR/2011 (h9.2.2), A/ck/Libya/D31  
214 TRACH/2006, A/ck/Jordan/901-F5/2003 (h9.4.1, G1-like) were classified as outliers as they  
215 were >3.0 in AU distance from any of the consensus antigens (grey; **Fig. 2 and Table 2**). H9s  
216 with <40 HI titers against any of the antisera were considered to have low to no cross-reactivity  
217 against any of the antisera and were removed from the antigenic analysis (**Table 2**). Overall, we  
218 observed mismatching between phylogenetic and antigenic analysis among viruses within the  
219 h9.3 and h9.4 lineages, mostly poultry isolates. Both h9.3 and h9.4 phylogenetic lineages  
220 contained the most antigenically variable strains, which fell under the different clusters (and  
221 some were outliers). The A/qa/UAE/302/2001 (b18, **Fig 2D**) HA antigen was equally distant  
222 from h9.4.2 and WF10 antigens with 2.1 AU of distance in both cases (**Table 2**). Taken  
223 together, the results provide an antigenic map of the H9 HA using consensus and wild type HA  
224 sequences probed with quail sera.

225 **Analysis of antigenic cluster transitions.** To better define the amino acid signatures involved  
226 in the antigenic profile of H9 HA antigens the differences among the prototypic WF10 h9.4.1  
227 (cyan), the h9.4.2 (blue), and the h9.3.9 consensus viruses were further analyzed. The HAU  
228 distance between WF10 h9.4.1 and h9.4.2 are lower (3.4 AU) than the distance between WF10

229 h9.4.1 and h9.3.9 (4.1 AU). Amino acid substitution differences between WF10 h9.4.1 (cyan)  
230 and the h9.4.2 (blue) include E72G, G135D, E180A, and I186T, which have been previously  
231 reported as antigenically relevant for H9 (12, 13, 16, 17, 34). We selected 9 positions, 72, 131,  
232 135, 150, 180, 186, 188, 198, and 217 that differed between WF10 h9.4.1 and h9.4.2 and  
233 changed specific amino acid positions by site-directed mutagenesis. (**Fig 3A-B and Table 4**).  
234 The WF10-9p-h9.4.2 virus expressing the WF10 HA with the 9 amino acid signatures of the  
235 h9.4.2 consensus showed antigenic cluster transition from cyan (WF10 h9.4.1) to blue (h9.4.2)  
236 (**Fig 3C**). The distance between WF10 h9.4.1 and WF10-9p-h9.4.2 was 3.8 AU, whereas the  
237 distance between h9.4.2 and WF10-9p-h9.4.2 was 1.6 AU. The counterpart h9.4.2-9p-WF10  
238 virus expressing the h9.4.2 HA1 portion with the 9 amino acids from WF10 (**Fig 3B**) showed  
239 antigen transition from the blue (h9.4.2) to cyan (WF10 h9.4.1) cluster (**Fig 3C**). The distance  
240 between h9.4.2 and h9.4.2-9p-WF10 was 3.2 AU, whereas the distance between h9.4.2-9p-  
241 WF10 and WF10 h9.4.1 was 0.7 AU confirming the antigenic relevance of these positions.  
242 Similarly, two WF10 h9.4.1 viruses (**Fig 4A-B**) carrying 7 amino acid signatures of h9.3.9  
243 (WF10-7p-h9.3.9a: 127, 131, 173, 180, 182, 183, and 217 and WF10-7p-h9.3.9b: 127, 131,  
244 146, 180, 182, 183, and 217) showed full cluster transition from cyan (h9.4.1) to orange (h9.3.9)  
245 (**Fig 4D and Table 4**) with 0.9 AU and 1 AU of distance between h9.3.9 and WF10-7p-h9.3.9a  
246 or WF10-7p-h9.3.9b, respectively. The h9.3.9-8p-WF10 virus with 8 amino acid signatures  
247 positions (127, 131, 146, 173, 180, 182, 183, and 217) of the WF10 h9.4.1 (**Fig 4C**) showed  
248 antigenic transition from orange (h9.3.9) to cyan (WF10 h9.4.1) (**Fig 4D**). Distances between  
249 h9.3.9-8p-WF10 (cyan) and h9.3.9 (orange) or WF10 h9.4.1 (cyan) were 3.6 AU and 1.3 AU,  
250 respectively. To further characterize antigenically relevant amino acid positions in more detail,  
251 single and double mutants in the context of WF10 h9.4.1 were produced (**Figs 5-6 and Table**  
252 **5**). From a panel of 19 mutants produced, 14 were viable. The results showed that the E180A-  
253 h9.4.2 single mutant (**Fig 5C**) and the R131K/E180A-h9.4.2 double mutant (**Fig 5E**) led to the  
254 most significant antigenic changes between WF10 h9.4.1 (cyan) and h9.4.2 (blue). In both  
255 cases, antigens were cross-reactive between the cyan and blue clusters, determined by an AU  
256 <3 from WF10 h9.4.1 (cyan) and h9.4.2 (blue). The remaining single and double mutants  
257 affected HI activity (**Tables 4 and 5**), but none resulted in cluster transitions. Taken together,  
258 the results show that different positions modulate with different magnitudes the antigenic  
259 properties of H9 HA. Amino acid 180 has, in general, the largest effect on HI activity.

260 Words: 1810

261



## 262 DISCUSSION

263 The HA has a pivotal role in the antigenicity of FLUAV as it is the major target of  
264 neutralizing antibodies and subject to positive selection. Phylogenetics combined with antigenic  
265 analysis is the basis for human, avian, and equine influenza vaccine selection (43). Antigenic  
266 cartography facilitates the understanding of FLUAV antigenic drift by visualizing HI data as a  
267 spatial relationship between antigens in a map (36, 38, 42). We captured the antigenic diversity  
268 of dissimilar H9 viruses, underscored by the ability of synthetic consensus viruses to induce HI  
269 responses that recognize their genetically related field antigens. For antigenic characterization,  
270 boost immunizations with inactivated-whole virus adjuvant formulations were performed in quail  
271 at 14 dpi and allowed increasing titer levels of poorly immunogenic antigens (**Fig. 2A**). Quail  
272 antibody responses to H9 FLUAV mimicked what was previously reported in the literature for  
273 chicken sera (13, 17). The synthetic consensus viruses aligned antigenically with  
274 representative H9 prototype field strains, supporting that the HA globular head has a pivotal role  
275 in shaping the antigenic phenotype. The results reinforce the hypothesis that genetic  
276 relatedness can predict the antigenic phenotype, with some exceptions (**Fig 2B-D**). WF10  
277 h9.4.1 and A/qa/HK/G1/97 (G1 prototype strain), which are phylogenetically related, showed  
278 also antigenic similarity (cyan cluster). These two antigens clustered separately from h9.4.2  
279 (blue cluster), which showed strong cross-reactivity with most poultry isolates from the Middle  
280 East and Asia (**Table 2**). Similarly, h9.3.3 and h9.3.4 consensus antigens demonstrated strong  
281 cross-reactivity with their respective prototype lineages A/ck/HK/G9/1997 (G9, h9.3.3-like) and  
282 A/dk/HK/Y280/1997 (Y280, h9.3.4-like). The strong HI cross-reactivity of the H9 field isolates  
283 against the heterologous clade-specific consensus antisera also supported the antigenic map  
284 results. Interestingly, consensus clades h9.3.3-7 and h9.4.2 showed similar antigenic  
285 phenotypes despite their genetic differences. Furthermore, the h9.3.9 (orange cluster) antigenic  
286 properties differed significantly from the rest of the h9.3 consensus viruses, with the highest  
287 reaction against its homologous sera (HI titer: 5120) and marginal cross-reactivity with  
288 heterologous sera. Strikingly, the % of identity between the h9.3.9 consensus HA and the  
289 closest relative (A/dk/Hunan/1/2006) was 93.3%, being the lowest observed among the different  
290 clades, perhaps exposing a gap in sequence availability from the online databases.  
291 Nonetheless, sequence comparison between h9.3.9 and A/dk/Hunan/1/2006 revealed  
292 differences in key positions such as G72E, R146Q, N149G, N183D, and M217Q (**Fig 4-6**)(12,  
293 13, 16, 17, 34) which may account for the antigenic differences despite the close phylogenetic  
294 relationships. Few other H9 field isolates fell outside the 3 AU radius from any consensus  
295 antigen, despite the intermediate level of reactivity against the antisera panel. These

296 observations highlight the significant impact of a few amino acid changes in modulating HI  
297 activity (35-38) and reiterate the importance of antigenic cartography in correcting phylogenetic  
298 predictions.

299 Most wild bird isolates from Europe and North America clustered with the h9.1.1 and  
300 h9.2.2 consensus antigens (red cluster) (**Table 2**), as predicted by the phylogenetic analysis.  
301 However, this data must be carefully interpreted due to the relatively low inherent antigenicity  
302 and immunogenicity of these antigens compared to the rest of the consensus and field antigens.  
303 This was evidenced by the relatively low homologous HI titers (40-160) obtained in quail  
304 immunized with h9.1.1 (HI titers: 80-160) and h9.2.2 (HI titers: 40-160) despite the boost and  
305 the overall poor cross-reactivity of these antigens with heterologous sera (**Table 1**). Similarly,  
306 most H9 wild bird isolates from Europe and North America had poor reactivity with any  
307 consensus heterologous sera (**Table S1**).

308 The generation of a humoral response that interferes with the interaction of HA with its  
309 receptor is key to achieving sterilizing immunity against FLUAV. Seven residues (145, 155, 156,  
310 158, 159, 189, and 193, H3 numbering) near the RBS were identified as the major determinants  
311 of antigenic drift in human and swine H3N2 FLUAVs (35, 39). Similarly, amino acid substitutions  
312 were identified as the major drivers of antigenic diversity of H5N1 clade 2.1, human H2N2, and  
313 pandemic H1N1 FLUAVs (37, 40, 41). For H9N2, molecular signatures of antigenicity are poorly  
314 characterized. Over 40 amino acid positions have been described for the H9 HA as antigenically  
315 relevant, mainly through generating escape mutants using mouse monoclonal antibodies and/or  
316 inferred from HI data (13, 14, 16, 19, 42-45). Using chicken sera, 24 amino acid positions  
317 distributed over the entire H9 HA were considered antigenically relevant (17). Based on the  
318 initial antigenic characterization (**Fig 2**), full cluster transitions from WF10 (cyan) to the h9.4.2  
319 (blue) and h9.3.9 (orange) antigenic profiles were readily observed with the WF10-9p-h9.4.2  
320 (substitutions at positions 72, 131, 135, 180, 186, 188, 198, and 217) and WF10-7p-h9.3.9a/b  
321 antigens (substitutions at positions 127, 131, 146 or 173, 180, 182, 183, and 217), respectively  
322 (**Fig 3 and 4**). The impact of single or double amino acid substitutions was less clear (**Figs 5**  
323 **and 6**). The E180A-h9.4.2 single mutant (**Fig 5C**) and the R131K/E180A-h9.4.2 double mutant  
324 (**Fig 5E**) showed the strongest effect, with antigens positioning at <3.0 AU from the cyan and  
325 blue antigenic cluster. These observations suggest a role for position 180 since the R131K  
326 single mutant had minimal effect on HI activity compared to the WF10 h9.4.1 HA (**Fig 5A**).  
327 Consistent with these observations, a previous report using the strain A/chicken/Shanghai/F/98  
328 (H9N2) determined position 180 as directly responsible for antigenic drift (30). Variability at  
329 position 180 was also reported in field isolates from Morocco between 2018-2019, reinforcing a

330 preponderant role of position 180 in evading pre-existing immunity (46). Consistent with the  
331 Morocco study, molecular characterization of H9N2 viruses from local markets in southern  
332 China also revealed a potential role of position 180 (and other positions) on antigenic properties  
333 (28). Spatiotemporal dynamics analysis from live-poultry markets in China has shown selection  
334 pressure in positions 146, 150, and 180 (47). A role of position 180 has been suggested also for  
335 the cross-species barrier where the 180V mutation favors the replication of H9N2 in mice (48).  
336 Other studies have attributed antigenic modulation to several HA residues without including  
337 position 180 (27, 49). The latter is consistent with the idea that additional positions within the HA  
338 can modulate the antigenic properties, which is consistent with the findings in this report where  
339 8 or 9 substitutions were introduced (**Fig 3 and 4**). A previous report also described the role of  
340 position 217 in H9 antigenicity. However, in the global scale analysis, position 217 alone is  
341 insufficient for an antigenic cluster transition suggesting modest effects on antigenicity (29).  
342 Position 183 was also recently suggested as a modulator of the antigenic properties and overall  
343 replication of H9N2 viruses (50). This is consistent with the results observed between WF10  
344 h9.4.1 (cyan) and h9.4.2 (blue). Antigenically relevant positions such as 180 and 217 have also  
345 been shown to affect receptor-binding avidity (29, 51, 52), as it has position 216 (4, 24, 53).

346 Other single or double substitutions showed changes in the level of antigenicity;  
347 however, none were enough on their own to produce complete antigenic cluster transitions (**Fig.**  
348 **5**). Reduced HI activity against the parental WF10 antiserum was observed for substitutions at  
349 positions G149N-h9.3.5 and F150A-h9.3.5 (1.7 AU and 1.5 AU respectively), but no reciprocal  
350 increase in cross-reactivity against the target antiserum was observed (**Table 4**). The  
351 F150L/Q217I-h9.4.2 double mutant had a higher impact on the parental WF10 than the single  
352 mutant Q217I-h9.4.2 (1.7 AU for 150-217-h9.4.2 versus 0.7 AU for 217-h9.4.2), and a similar  
353 effect was observed against the target h9.4.2 antiserum (4.5 AU for F150L/Q217I-h9.4.2 versus  
354 3.5 AU for Q217I-h9.4.2). These observations point to relatively few additional substitutions as  
355 likely responsible for antigenic cluster transitions.

356 Despite the remarkable plasticity of the H9 HA of WF10, reversions were observed in 5  
357 out of 19 mutants, suggesting that tolerability of changes in antigenically relevant amino acids  
358 may be context dependent and likely encompass compensatory substitutions (36, 54). In  
359 addition, we identified a set of non-cross-reactive strains (**Table 2 and Fig 2C**) whose initial  
360 sequence information would predict to fall in at least one of the antigenic clusters described.  
361 These strains included A/dk/HK/448/1978, A/qa/Saudi A/489\_46v08/2006,  
362 A/ck/NKorea/99020/99 and A/ma/Eng/7798\_6499/2006. The strain, A/ck/Tun/345/2011, with an  
363 HA1 region almost identical to A/ck/Tun/812/2012 in key amino acid signatures, failed to show

364 cross-reactivity with members of the blue cluster, suggesting the involvement of other potentially  
365 relevant epitopes.

366 Most studies of H9N2 antigenicity in poultry involve the use of chicken sera but not sera  
367 from minor land-based poultry species, such as quail. Japanese quails have been suggested as  
368 key players in the genesis of the adaptation of influenza viruses with respiratory tract tropism  
369 (21, 22). Quail are also more susceptible to H9N2 infection than chickens (31). In addition, quail  
370 show wide distribution in the respiratory tract of avian-like (SA $\alpha$ 2.3) and human-like (SA $\alpha$ 2.6)  
371 sialic acid receptors, which may have contributed to the emergence of the current poultry-  
372 adapted H9N2 strains with human-like receptor preference (55). Thus quail might have played a  
373 role as an intermediate host between wild aquatic birds and poultry in the emergence of H9N2  
374 strains with altered host range (23, 24). The antigenic analyses using quail antisera provide  
375 significant insights into anti-HA responses in a relevant poultry species for influenza replication  
376 and evolution. The current literature shows different approaches employed for the antisera  
377 generation, including live virus inoculation and inactivated/adjuvanted virus vaccination to study  
378 antigenicity of the HA of influenza viruses. Still, none have used quail sera as a model (17, 25-  
379 28). The results validate using the quail model to study the antigenicity of H9N2 as well as other  
380 viral properties such as virus replication, pathogenesis, and transmission. Although the results  
381 provide novel insights into the antigenic properties of FLUAV of the H9 subtype on a global  
382 scale, some limitations must be noted. The initial phylogenetic analysis for generating the  
383 consensus sequences was performed in 2016. As H9N2 viruses continue to evolve with  
384 inherent animal and public health risks, further studies are needed to better dissect the role of  
385 amino acid substitutions on the HA that modulate host range, replication, pathogenesis,  
386 transmission, and antigenicity.

387 In conclusion, phylogenetics was used to generate consensus on H9 viruses  
388 encompassing their natural diversity. We demonstrated that these consensus H9 viruses were  
389 biologically active, capable of triggering an immune response associated with the generation of  
390 neutralizing antibodies, and manifested important distinctive biologic characteristics driven only  
391 by their differences in the HA1 domains. Using this system, we explored antigenicity and  
392 modulation of HI profiles using antisera obtained from quail. The sera obtained allowed us to  
393 narrow down antigenically relevant amino acids, as many as 9 for h9.4.2 (at positions 72, 131,  
394 135, 180, 186, 188, 198, and 217) and 6 for h9.3.9 (127, 131, 180, 182, 183, and 217) to as few  
395 as 1 (E180A), to produce antigenic cluster transitions. The results are relevant to pave the way  
396 for a better understanding of the molecular signatures of antigenicity in H9 viruses, facilitating a

397 rational approach for selecting more efficacious vaccines against poultry-origin H9 influenza  
398 viruses.

399 Words: 1797

## 400 **MATERIALS AND METHODS**

401 **Ethics statement.** Use of quail for sera preparation against H9 FLUAVs adhered to and  
402 approved by the Institutional Animal Care and Use Committee of UGA under protocols  
403 A201506-026-Y3-A5. Quail studies were conducted in a USDA-approved ABSL2 facility at the  
404 Poultry Diagnostic Research Center, College of Veterinary medicine, UGA, with each group of  
405 quail housed in individual HEPA in/out isolator units. As needed, based on humane endpoints or  
406 at the end of the experiments, animals were humanely euthanized following guidelines  
407 approved by the American Veterinary Medical Association.

408 **Cells.** Madin-Darby canine kidney (MDCK) cells were a kind gift from Robert Webster (St. Jude  
409 Children's Research Hospital, Memphis, TN). Human embryonic kidney 293T cells were  
410 obtained from the American Type Culture Collection (CRL-3216, Manassas, VA). Cells were  
411 maintained in Dulbecco's modified Eagle's medium (DMEM; Sigma-Aldrich, St. Louis, MO)  
412 containing 10% fetal bovine serum (Sigma-Aldrich), 1% antibiotic-antimycotic (Sigma- Aldrich)  
413 and 1% L-glutamine (Sigma- Aldrich). Cells were cultured at 37°C in a humidified incubator  
414 under 5% CO<sub>2</sub>.

415 **Database and phylogenetic analysis of HA sequences.** H9 HA sequences were obtained  
416 from the Influenza Research Database (IRD), the Bacterial and Viral Bioinformatics Resource  
417 Center (BV-BRC), and the Global Initiative on Sharing All Influenza Data (GISAID) (56, 57). The  
418 initial phylogenetic analysis was performed on 984 global representative H9 avian isolates from  
419 1966 to the 18th of March 2016 and was used to build the H9 consensus sequences presented  
420 in this study. The phylogenetic analysis was then updated on July 14<sup>th</sup>, 2020, and included  
421 1,316 manually curated sequences. The amino acid frequencies were analyzed using the  
422 protein sequence variant analysis tool provided by Scop3D (58). HA sequences were mapped  
423 to the A/gf/HK/WF10/1999 (WF10), GenBank accession #AY206676, (31) reference sequence  
424 using Geneious (version 10.2.3, Auckland, New Zealand). H9 HA1 sequences spanning the  
425 period from 1966 to 2020 were manually pruned to remove truncated and or repetitive  
426 sequences. An amino acid alignment was generated using default settings in MUSCLE (59).  
427 The numbering of HA corresponds to the mature H9 HA. All known key antigenic sites were  
428 considered in the phylogenetic algorithm using optimization with GARLI (60). A maximum-  
429 likelihood tree was inferred using RAxML v.8.1.24 (61) with a general time-reversible (GTR)

430 substitution model with gamma-distributed rate variation among sites, followed by Garli for  
431 branch optimization. A starting tree was generated using parsimony methods with the best-  
432 scoring tree, and statistical support was obtained using the rapid bootstrap algorithm. Initially,  
433 18 consensus sequences were produced, representative of genetic variations within  
434 phylogenetic groups. Of these, 10 consensus sequences were selected (**Fig. 1**).

435 **Generation of chimeric HA plasmids for reverse genetics.** The cDNA copies encoding the  
436 HA1 consensus or mutant sequences were synthesized by Genscript (Piscataway, NJ, USA)  
437 and then sub-cloned into the plasmid pDP-BsmbI-WF10\_HA2 encoding the HA2 portion of  
438 WF10. All chimeric constructs contained the identical cleavage site motif (PARSSR) of the WT  
439 HA of WF10.

440 **Viruses.** Chimeric HA plasmids were used for reverse genetics using the previously described  
441 WF10 backbone (53, 62). Reverse genetics was performed using co-cultured 293T and MDCK  
442 cells, as previously detailed (63). Virus stocks were prepared in MDCK cells or 9 to 11-day-old  
443 specific pathogen-free (SPF) embryonated chicken eggs. Virus stocks were aliquoted and  
444 stored at -80°C until use. Virus stocks were titrated by tissue culture infectious dose 50 (TCID<sub>50</sub>)  
445 as described (64).

446 **Sequencing.** Standard Sanger sequencing was performed on all HA plasmids and HA PCR  
447 products from all H9 virus stocks by Psomagen (Rockville, MD, USA). Next-generation  
448 sequencing (NGS) was performed on all consensus viruses' whole genomes to exclude  
449 unwanted substitutions. For whole-genome sequencing, amplicon sequence libraries were  
450 prepared using the Nextera XT DNA library preparation kit (Illumina, San Diego, CA) according  
451 to the manufacturer's protocol. Barcoded libraries were multiplexed and sequenced on a high-  
452 throughput Illumina MiSeq sequencing platform in a paired-end 150-nucleotide run format. De  
453 novo genome assembly was performed as described previously (65).

454 **Preparation of H9 antisera in quail.** 3-week-old Japanese quails (*Coturnix c. japonica*,  
455 n=6/group) were inoculated by the oculo-nasal-tracheal route with 10<sup>6</sup> TCID<sub>50</sub>/quail of the  
456 following WF10-chimeric HA (H9N2) viruses: h9.1.1, h9.2.2, h9.3.3, h9.3.4, h9.3.5, h9.3.7,  
457 h9.3.9, h9.4.1 (WF10) and h9.4.2. A negative control (n=6, mock-inoculated with PBS) was  
458 included. Active infections were monitored by Flu DETECT (Zoetis, Kalamazoo, Michigan) on  
459 tracheal swabs collected from days 1-7 post-inoculation. Boost vaccination was performed with  
460 the homologous virus inactivated at 4°C for 3 days with 0.1% beta propiolactone (BPL) (Sigma-  
461 Aldrich Corporation, St. Louis, MO) as previously described (66). On the day of the boost, 512-  
462 1024 HAU/50ul of the corresponding virus was mixed 1:1 (vol/vol) with Montanide ISA 71 VG



463 adjuvant (Seppic, Paris, France), in an emulsion, as per manufacturer protocol. Then, quail  
464 were inoculated subcutaneously in the neck with 300  $\mu$ L (150  $\mu$ L inactivated virus + 150  $\mu$ L  
465 Montanide) of the homologous virus-adjuvant emulsion. At 14 days post-boost (dpb), quails  
466 were terminally bled under anesthesia, and sera were collected for HI assays. After testing each  
467 bird's seroconversion level, sera with similar titers were pooled, three quail/pool, two sera  
468 pools/antigen (**Table 1**).

469 **Antigenic characterization.** Standard hemagglutination (HA) and HI assays were performed  
470 as previously described (67). Before HI testing, sera were heat inactivated at 56°C for 30 min  
471 and adsorbed with 50% chicken red blood cells (RBCs) to remove nonspecific inhibitors of  
472 hemagglutination. Sterile PBS was added, allowing the sera to reach a final dilution of 1:10.  
473 Then sera were transferred to 96-well plates and serially diluted 2-fold in 25  $\mu$ L of sterile PBS  
474 and mixed with 4 HAU/25  $\mu$ L of each virus. The virus-sera mixture was incubated for 15 min at  
475 room temperature and then added 50  $\mu$ L per well of 0.5% chicken RBCs (100  $\mu$ L final  
476 volume/well). The HI activity was determined after 45 min of incubation.

477 **Antigenic cartography.** The HI data using quail sera (**Table S1**) was analyzed separately and  
478 merged through the ACMACS antigenic cartography website ([https://acmacs-web.antigenic-](https://acmacs-web.antigenic-cartography.org)  
479 [cartography.org](https://acmacs-web.antigenic-cartography.org)) as previously described (68, 69). HI data sets were subject to a dimensional  
480 analysis in all dimensions (2D, 3D, 4D and 5D) with 2,000 optimizations and an automatic  
481 minimum column basis parameter to identify which model best fits this data set. Antigens that  
482 exploited no to low (<40) reactivity against the entire antisera panel were removed from the  
483 analysis and annotated. The distance between the spheres (antigens) and antisera (squares) is  
484 inversely correlated to the  $\log_2$  titer measured by the HI assay. One antigenic unit is the  
485 equivalent of a 2-fold loss/gain in HI activity. Clusters were initially established by applying the  
486 Ward method of hierarchical clustering. Within these, reference antigens were selected based  
487 on their biological significance, and clusters were adjusted to enclose antigens exclusively  
488 within a 3 AU radius from these selected reference antigens. We used 3 AU or a  $\geq 8$ -fold loss in  
489 cross-reactivity, as defined by the WHO recommendation to update human seasonal vaccine  
490 strains, as the threshold of significant antigenic difference.

491 **Site Direct Mutagenesis.** The site-directed mutagenesis kit (ThermoFisher, Waltham, MA)  
492 generated single and double amino acid substitutions in the WF10 HA gene segment following  
493 manufacturer conditions. Plasmid sequences were confirmed by Sanger sequencing.

494 Words: 1172

495

## 496 **ACKNOWLEDGMENTS**

497 We thank the personnel from the animal resources and administrative staff at the Poultry  
498 Diagnostic and Research Center, University of Georgia, and at the Animal Plant Health Agency  
499 (APHA, UK) for technical support. Thanks to Stephen, Natalie, Susan, and James at APHA for  
500 their professional assistance. We thank Stivalis Cardenas Garcia for valuable discussions. This  
501 study was supported by a subcontract from the Center for Research on Influenza Pathogenesis  
502 (CRIP) to D.R.P. under contract HHSN272201400008C, Centers for Influenza Research and  
503 Surveillance (CEIRS) and 75N93021C00014 Centers for Influenza Research and Response  
504 (CEIRR) from the National Institute of Allergy and Infectious Diseases (NIAID). Additional funds  
505 were obtained by D.R.P under GRANT12901999, Proposal 2019-05890, Accession Number  
506 1022658 from the National Institute of Food and Agriculture (NIFA), U.S. Department of  
507 Agriculture. D.R.P. receives additional support from the Georgia Research Alliance and the  
508 Caswell S. Eidson endowment funds from The University of Georgia. SC received a short-term  
509 training award from the NIAID CEIRS Training Program. This study was partly supported by  
510 resources and technical expertise from the Georgia Advanced Computing Resource Center, a  
511 partnership between the University of Georgia's Office of the Vice President for Research and  
512 the Office of the Vice President for Information Technology.

513 **Author contributions:** SC, CJC, LCG, LMF, and AO performed reverse genetics of  
514 recombinant influenza viruses, produced sera against H9 antigens in quail, and processed the  
515 samples. SC and CJC performed phylogenetic analyses. ES assisted with the initial  
516 phylogenetic analysis. DB performed initial phylogenetic analysis for the selection of consensus  
517 H9 HA antigens. IB provided H9N2 virus strains. GG sequenced viruses by NGS. DSR assisted  
518 in the interpretation of antigenic cartography. DB and MR assisted with the initial assessment of  
519 H9 HA antigens and edited the manuscript. NL assisted with antigenic cartography analyses  
520 and editing the manuscript. DRP was responsible for the overall study design, including the  
521 design of synthetic chimeric HA constructs. SC, CJC, DSR, and DRP participated in the data  
522 analysis, antigenic cartography, antigenic analysis and wrote and edited the manuscript. All  
523 authors have seen and approved the manuscript prior to submission.

524

## 525 **REFERENCES**

- 526 1. Perez DR, de Wit JJS. 2016. Low-pathogenicity avian influenza, p 271-301. *In* Swayne  
527 D (ed), *Animal Influenza* doi:10.1002/9781118924341.ch11. John Wiley & Sons.

- 528 2. Carnaccini S, Perez DR. 2019. H9 Influenza Viruses: An Emerging Challenge. Cold  
529 Spring Harb Perspect Med doi:10.1101/cshperspect.a038588.
- 530 3. Carnaccini S, Perez DR. 2020. H9 Influenza Viruses: An Emerging Challenge. Cold  
531 Spring Harb Perspect Med 10.
- 532 4. Caceres CJ, Rajao DS, Perez DR. 2021. Airborne Transmission of Avian Origin H9N2  
533 Influenza A Viruses in Mammals. *Viruses* 13.
- 534 5. Lee DH, Fusaro A, Song CS, Suarez DL, Swayne DE. 2016. Poultry vaccination directed  
535 evolution of H9N2 low pathogenicity avian influenza viruses in Korea. *Virology* 488:225-  
536 31.
- 537 6. Zhang P, Tang Y, Liu X, Peng D, Liu W, Liu H, Lu S, Liu X. 2008. Characterization of  
538 H9N2 influenza viruses isolated from vaccinated flocks in an integrated broiler chicken  
539 operation in eastern China during a 5 year period (1998-2002). *J Gen Virol* 89:3102-12.
- 540 7. Park KJ, Kwon HI, Song MS, Pascua PN, Baek YH, Lee JH, Jang HL, Lim JY, Mo IP,  
541 Moon HJ, Kim CJ, Choi YK. 2011. Rapid evolution of low-pathogenic H9N2 avian  
542 influenza viruses following poultry vaccination programmes. *J Gen Virol* 92:36-50.
- 543 8. Shanmuganatham K, Feeroz MM, Jones-Engel L, Smith GJ, Fourment M, Walker D,  
544 McClenaghan L, Alam SM, Hasan MK, Seiler P, Franks J, Danner A, Barman S,  
545 McKenzie P, Krauss S, Webby RJ, Webster RG. 2013. Antigenic and molecular  
546 characterization of avian influenza A(H9N2) viruses, Bangladesh. *Emerg Infect Dis* 19.
- 547 9. Ali M, Yaqub T, Mukhtar N, Imran M, Ghafoor A, Shahid MF, Yaqub S, Smith GJD, Su  
548 YCF, Naeem M. 2018. Prevalence and Phylogenetics of H9n2 in Backyard and  
549 Commercial Poultry in Pakistan. *Avian Dis* 62:416-424.
- 550 10. Jiang W, Liu S, Hou G, Li J, Zhuang Q, Wang S, Zhang P, Chen J. 2012. Chinese and  
551 global distribution of H9 subtype avian influenza viruses. *PLoS One* 7:e52671.
- 552 11. Marinova-Petkova A, Shanmuganatham K, Feeroz MM, Jones-Engel L, Hasan MK,  
553 Akhtar S, Turner J, Walker D, Seiler P, Franks J, McKenzie P, Krauss S, Webby RJ,  
554 Webster RG. 2016. The Continuing Evolution of H5N1 and H9N2 Influenza Viruses in  
555 Bangladesh Between 2013 and 2014. *Avian Dis* 60:108-17.

- 556 12. Kaverin NV, Rudneva IA, Ilyushina NA, Lipatov AS, Krauss S, Webster RG. 2004.  
557 Structural differences among hemagglutinins of influenza A virus subtypes are reflected  
558 in their antigenic architecture: analysis of H9 escape mutants. *J Virol* 78:240-9.
- 559 13. Peacock T, Reddy K, James J, Adamiak B, Barclay W, Shelton H, Iqbal M. 2016.  
560 Antigenic mapping of an H9N2 avian influenza virus reveals two discrete antigenic sites  
561 and a novel mechanism of immune escape. *Sci Rep* 6:18745.
- 562 14. Okamatsu M, Sakoda Y, Kishida N, Isoda N, Kida H. 2008. Antigenic structure of the  
563 hemagglutinin of H9N2 influenza viruses. *Arch Virol* 153:2189-95.
- 564 15. Wang Y, Davidson I, Fouchier R, Spackman E. 2016. Antigenic Cartography of H9 Avian  
565 Influenza Virus and Its Application to Vaccine Selection. *Avian Dis* 60:218-25.
- 566 16. Zhu Y, Yang D, Ren Q, Yang Y, Liu X, Xu X, Liu W, Chen S, Peng D, Liu X. 2015.  
567 Identification and characterization of a novel antigenic epitope in the hemagglutinin of  
568 the escape mutants of H9N2 avian influenza viruses. *Vet Microbiol* 178:144-9.
- 569 17. Peacock TP, Harvey WT, Sadeyen JR, Reeve R, Iqbal M. 2018. The molecular basis of  
570 antigenic variation among A(H9N2) avian influenza viruses. *Emerg Microbes Infect*  
571 7:176.
- 572 18. Adel A, Arafa A, Hussein HA, El-Sanousi AA. 2017. Molecular and antigenic traits on  
573 hemagglutinin gene of avian influenza H9N2 viruses: Evidence of a new escape mutant  
574 in Egypt adapted in quails. *Res Vet Sci* 112:132-140.
- 575 19. Ping J, Li C, Deng G, Jiang Y, Tian G, Zhang S, Bu Z, Chen H. 2008. Single-amino-acid  
576 mutation in the HA alters the recognition of H9N2 influenza virus by a monoclonal  
577 antibody. *Biochemical and biophysical research communications* 371:168-71.
- 578 20. Wan Z, Ye J, Xu L, Shao H, Jin W, Qian K, Wan H, Qin A. 2014. Antigenic mapping of  
579 the hemagglutinin of an H9N2 avian influenza virus reveals novel critical amino acid  
580 positions in antigenic sites. *J Virol* 88:3898-901.
- 581 21. Hossain MJ, Hickman D, Perez DR. 2008. Evidence of expanded host range and  
582 mammalian-associated genetic changes in a duck H9N2 influenza virus following  
583 adaptation in quail and chickens. *PLoS One* 3:e3170.

- 584 22. Makarova NV, Ozaki H, Kida H, Webster RG, Perez DR. 2003. Replication and  
585 transmission of influenza viruses in Japanese quail. *Virology* 310:8-15.
- 586 23. Perez DR, Webby RJ, Hoffmann E, Webster RG. 2003. Land-based birds as potential  
587 disseminators of avian mammalian reassortant influenza A viruses. *Avian Dis* 47:1114-7.
- 588 24. Wan H, Perez DR. 2006. Quail carry sialic acid receptors compatible with binding of  
589 avian and human influenza viruses. *Virology* 346:278-86.
- 590 25. Zhu R, Xu D, Yang X, Zhang J, Wang S, Shi H, Liu X. 2018. Genetic and biological  
591 characterization of H9N2 avian influenza viruses isolated in China from 2011 to 2014.  
592 *PLoS One* 13:e0199260.
- 593 26. Ge F, Li X, Ju H, Yang D, Liu J, Qi X, Wang J, Yang X, Qiu Y, Liu P, Zhou J. 2016.  
594 Genotypic evolution and antigenicity of H9N2 influenza viruses in Shanghai, China. *Arch*  
595 *Virol* 161:1437-45.
- 596 27. Zheng Y, Guo Y, Li Y, Liang B, Sun X, Li S, Xia H, Ping J. 2022. The molecular  
597 determinants of antigenic drift in a novel avian influenza A (H9N2) variant virus. *Virol J*  
598 19:26.
- 599 28. Yan W, Cui H, Engelsma M, Beerens N, van Oers MM, de Jong MCM, Li X, Liu Q, Yang  
600 J, Teng Q, Li Z. 2022. Molecular and Antigenic Characterization of Avian H9N2 Viruses  
601 in Southern China. *Microbiol Spectr* 10:e0082221.
- 602 29. Sun Y, Cong Y, Yu H, Ding Z, Cong Y. 2021. Assessing the effects of a two-amino acid  
603 flexibility in the Hemagglutinin 220-loop receptor-binding domain on the fitness of  
604 Influenza A(H9N2) viruses. *Emerg Microbes Infect* 10:822-832.
- 605 30. Zhu R, Xu S, Sun W, Li Q, Wang S, Shi H, Liu X. 2022. HA gene amino acid mutations  
606 contribute to antigenic variation and immune escape of H9N2 influenza virus. *Vet Res*  
607 53:43.
- 608 31. Perez DR, Lim W, Seiler JP, Yi G, Peiris M, Shortridge KF, Webster RG. 2003. Role of  
609 quail in the interspecies transmission of H9 influenza A viruses: molecular changes on  
610 HA that correspond to adaptation from ducks to chickens. *J Virol* 77:3148-56.

- 611 32. Wan H, Perez DR. 2007. Amino acid 226 in the hemagglutinin of H9N2 influenza viruses  
612 determines cell tropism and replication in human airway epithelial cells. *J Virol* 81:5181-  
613 91.
- 614 33. Fouchier RA, Smith DJ. 2010. Use of antigenic cartography in vaccine seed strain  
615 selection. *Avian Dis* 54:220-3.
- 616 34. Wu R, Zhang H, Yang K, Liang W, Xiong Z, Liu Z, Yang X, Shao H, Zheng X, Chen M,  
617 Xu D. 2009. Multiple amino acid substitutions are involved in the adaptation of H9N2  
618 avian influenza virus to mice. *Vet Microbiol* 138:85-91.
- 619 35. Abente EJ, Santos J, Lewis NS, Gauger PC, Stratton J, Skepner E, Anderson TK, Rajao  
620 DS, Perez DR, Vincent AL. 2016. The Molecular Determinants of Antibody Recognition  
621 and Antigenic Drift in the H3 Hemagglutinin of Swine Influenza A Virus. *J Virol* 90:8266-  
622 80.
- 623 36. Santos JJS, Abente EJ, Obadan AO, Thompson AJ, Ferreri L, Geiger G, Gonzalez-  
624 Reiche AS, Lewis NS, Burke DF, Rajao DS, Paulson JC, Vincent AL, Perez DR. 2019.  
625 Plasticity of Amino Acid Residue 145 Near the Receptor Binding Site of H3 Swine  
626 Influenza A Viruses and Its Impact on Receptor Binding and Antibody Recognition. *J*  
627 *Virol* 93.
- 628 37. Koel BF, Mogling R, Chutinimitkul S, Fraaij PL, Burke DF, van der Vliet S, de Wit E,  
629 Bestebroer TM, Rimmelzwaan GF, Osterhaus AD, Smith DJ, Fouchier RA, de Graaf M.  
630 2015. Identification of amino acid substitutions supporting antigenic change of influenza  
631 A(H1N1)pdm09 viruses. *J Virol* 89:3763-75.
- 632 38. Both GW, Shi CH, Kilbourne ED. 1983. Hemagglutinin of swine influenza virus: a single  
633 amino acid change pleiotropically affects viral antigenicity and replication. *Proc Natl*  
634 *Acad Sci U S A* 80:6996-7000.
- 635 39. Koel BF, Burke DF, Bestebroer TM, van der Vliet S, Zondag GC, Vervaet G, Skepner E,  
636 Lewis NS, Spronken MI, Russell CA, Eropkin MY, Hurt AC, Barr IG, de Jong JC,  
637 Rimmelzwaan GF, Osterhaus AD, Fouchier RA, Smith DJ. 2013. Substitutions near the  
638 receptor binding site determine major antigenic change during influenza virus evolution.  
639 *Science* 342:976-9.



- 640 40. Koel BF, van der Vliet S, Burke DF, Bestebroer TM, Bharoto EE, Yasa IW, Herliana I,  
641 Laksono BM, Xu K, Skepner E, Russell CA, Rimmelzwaan GF, Perez DR, Osterhaus  
642 AD, Smith DJ, Prajitno TY, Fouchier RA. 2014. Antigenic variation of clade 2.1 H5N1  
643 virus is determined by a few amino acid substitutions immediately adjacent to the  
644 receptor binding site. *MBio* 5:e01070-14.
- 645 41. Linster M, Schrauwen EJA, van der Vliet S, Burke DF, Lexmond P, Bestebroer TM,  
646 Smith DJ, Herfst S, Koel BF, Fouchier RAM. 2019. The Molecular Basis for Antigenic  
647 Drift of Human A/H2N2 Influenza Viruses. *J Virol* 93.
- 648 42. Jin F, Dong X, Wan Z, Ren D, Liu M, Geng T, Zhang J, Gao W, Shao H, Qin A, Ye J.  
649 2019. A Single Mutation N166D in Hemagglutinin Affects Antigenicity and Pathogenesis  
650 of H9N2 Avian Influenza Virus. *Viruses* 11.
- 651 43. Kandeil A, El-Shesheny R, Maatouq AM, Moatasim Y, Shehata MM, Bagato O, Rubrum  
652 A, Shanmuganatham K, Webby RJ, Ali MA, Kayali G. 2014. Genetic and antigenic  
653 evolution of H9N2 avian influenza viruses circulating in Egypt between 2011 and 2013.  
654 *Arch Virol* 159:2861-76.
- 655 44. Zhang Y, Yin Y, Bi Y, Wang S, Xu S, Wang J, Zhou S, Sun T, Yoon KJ. 2012. Molecular  
656 and antigenic characterization of H9N2 avian influenza virus isolates from chicken flocks  
657 between 1998 and 2007 in China. *Vet Microbiol* 156:285-93.
- 658 45. Zhang J, Wu H, Zhang Y, Cao M, Brisse M, Zhu W, Li R, Liu M, Cai M, Chen J, Chen J.  
659 2019. Molecular evolutionary and antigenic characteristics of newly isolated H9N2 avian  
660 influenza viruses in Guangdong province, China. *Arch Virol* 164:607-612.
- 661 46. Sikht FZ, Ducatez M, Touzani CD, Rubrum A, Webby R, El Houadfi M, Tligui NS, Camus  
662 C, Fellahi S. 2022. Avian Influenza a H9N2 Viruses in Morocco, 2018-2019. *Viruses* 14.
- 663 47. Liu T, Xie S, Yang Z, Zha A, Shi Y, Xu L, Chen J, Qi W, Liao M, Jia W. 2023. That H9N2  
664 avian influenza viruses circulating in different regions gather in the same live-poultry  
665 market poses a potential threat to public health. *Front Microbiol* 14:1128286.
- 666 48. Teng Q, Xu D, Shen W, Liu Q, Rong G, Li X, Yan L, Yang J, Chen H, Yu H, Ma W, Li Z.  
667 2016. A Single Mutation at Position 190 in Hemagglutinin Enhances Binding Affinity for  
668 Human Type Sialic Acid Receptor and Replication of H9N2 Avian Influenza Virus in  
669 Mice. *J Virol* 90:9806-9825.

- 670 49. Liu Q, Zhao L, Guo Y, Zhao Y, Li Y, Chen N, Lu Y, Yu M, Deng L, Ping J. 2022.  
671 Antigenic Evolution Characteristics and Immunological Evaluation of H9N2 Avian  
672 Influenza Viruses from 1994-2019 in China. *Viruses* 14.
- 673 50. Wan Z, Zhao Z, Sang J, Jiang W, Chen J, Tang T, Li Y, Kan Q, Shao H, Zhang J, Xie Q,  
674 Li T, Qin A, Ye J. 2023. Amino Acid Variation at Hemagglutinin Position 193 Impacts the  
675 Properties of H9N2 Avian Influenza Virus. *J Virol* 97:e0137922.
- 676 51. Sealy JE, Yaqub T, Peacock TP, Chang P, Ermetal B, Clements A, Sadeyen JR,  
677 Mehboob A, Shelton H, Bryant JE, Daniels RS, McCauley JW, Iqbal M. 2018.  
678 Association of Increased Receptor-Binding Avidity of Influenza A(H9N2) Viruses with  
679 Escape from Antibody-Based Immunity and Enhanced Zoonotic Potential. *Emerg Infect*  
680 *Dis* 25:63-72.
- 681 52. Zhu R, Xu S, Sun W, Li Q, Wang S, Shi H, Liu X. 2022. Correction: HA gene amino acid  
682 mutations contribute to antigenic variation and immune escape of H9N2 influenza virus.  
683 *Vet Res* 53:112.
- 684 53. Obadan AO, Santos J, Ferreri L, Thompson AJ, Carnaccini S, Geiger G, Gonzalez  
685 Reiche AS, Rajao DS, Paulson JC, Perez DR. 2019. Flexibility In Vitro of Amino Acid  
686 226 in the Receptor-Binding Site of an H9 Subtype Influenza A Virus and Its Effect In  
687 Vivo on Virus Replication, Tropism, and Transmission. *J Virol* 93.
- 688 54. Koel BF, Burke DF, van der Vliet S, Bestebroer TM, Rimmelzwaan GF, Osterhaus A,  
689 Smith DJ, Fouchier RAM. 2019. Epistatic interactions can moderate the antigenic effect  
690 of substitutions in haemagglutinin of influenza H3N2 virus. *J Gen Virol* 100:773-777.
- 691 55. Wan HQ, Perez DR. 2006. Quail carry sialic acid receptors compatible with binding of  
692 avian and human influenza viruses. *VIROLOGY* 346:278-286.
- 693 56. Zhang Y, Aevermann BD, Anderson TK, Burke DF, Dauphin G, Gu Z, He S, Kumar S,  
694 Larsen CN, Lee AJ, Li X, Macken C, Mahaffey C, Pickett BE, Reardon B, Smith T,  
695 Stewart L, Suloway C, Sun G, Tong L, Vincent AL, Walters B, Zaremba S, Zhao H, Zhou  
696 L, Zmasek C, Klem EB, Scheuermann RH. 2017. Influenza Research Database: An  
697 integrated bioinformatics resource for influenza virus research. *Nucleic Acids Res*  
698 45:D466-D474.

- 699 57. Shu Y, McCauley J. 2017. GISAID: Global initiative on sharing all influenza data - from  
700 vision to reality. *Euro Surveill* 22.
- 701 58. Vermeire T, Vermaere S, Schepens B, Saelens X, Van Gucht S, Martens L,  
702 Vandermarliere E. 2015. Scop3D: three-dimensional visualization of sequence  
703 conservation. *Proteomics* 15:1448-52.
- 704 59. Edgar RC. 2004. MUSCLE: multiple sequence alignment with high accuracy and high  
705 throughput. *Nucleic Acids Res* 32:1792-7.
- 706 60. Bazinet AL, Zwickl DJ, Cummings MP. 2014. A gateway for phylogenetic analysis  
707 powered by grid computing featuring GARLI 2.0. *Syst Biol* 63:812-8.
- 708 61. Stamatakis A. 2014. RAxML version 8: a tool for phylogenetic analysis and post-analysis  
709 of large phylogenies. *Bioinformatics* 30:1312-3.
- 710 62. Chutinimitkul S, Herfst S, Steel J, Lowen AC, Ye J, van Riel D, Schrauwen EJ,  
711 Bestebroer TM, Koel B, Burke DF, Sutherland-Cash KH, Whittleston CS, Russell CA,  
712 Wales DJ, Smith DJ, Jonges M, Meijer A, Koopmans M, Rimmelzwaan GF, Kuiken T,  
713 Osterhaus AD, Garcia-Sastre A, Perez DR, Fouchier RA. 2010. Virulence-associated  
714 substitution D222G in the hemagglutinin of 2009 pandemic influenza A(H1N1) virus  
715 affects receptor binding. *Journal of virology* 84:11802-13.
- 716 63. Perez DR, Angel M, Gonzalez-Reiche AS, Santos J, Obadan A, Martinez-Sobrido L.  
717 2017. Plasmid-Based Reverse Genetics of Influenza A Virus. *Methods Mol Biol*  
718 1602:251-273.
- 719 64. Reed LJ, Muench H. 1938. A simple method for estimating fifty percent endpoints. *Am J*  
720 *Hyg* 27:493-497.
- 721 65. Ferreri LM, Ortiz L, Geiger G, Barriga GP, Poulson R, Gonzalez-Reiche AS, Crum JA,  
722 Stallknecht D, Moran D, Cordon-Rosales C, Rajao D, Perez DR. 2019. Improved  
723 detection of influenza A virus from blue-winged teals by sequencing directly from swab  
724 material. *Ecol Evol* 9:6534-6546.
- 725 66. Cardenas-Garcia S, Ferreri L, Wan Z, Carnaccini S, Geiger G, Obadan AO, Hofacre CL,  
726 Rajao D, Perez DR. 2019. Maternally-Derived Antibodies Protect against Challenge with  
727 Highly Pathogenic Avian Influenza Virus of the H7N3 Subtype. *Vaccines (Basel)* 7.

- 728 67. Webster R, Cox N, Stohr K. 2005. WHO Manual on Animal Influenza Diagnosis and  
729 Surveillance, on World Health Organization Department of Communicable Disease  
730 Surveillance and Response. [http:// www.who.int/ csr/ resources/ publications/ influenza/](http://www.who.int/csr/resources/publications/influenza/whocdscsrncs20025rev.pdf)  
731 [whocdscsrncs20025rev.pdf](http://www.who.int/csr/resources/publications/influenza/whocdscsrncs20025rev.pdf). Accessed
- 732 68. Smith DJ, Lapedes AS, de Jong JC, Bestebroer TM, Rimmelzwaan GF, Osterhaus AD,  
733 Fouchier RA. 2004. Mapping the antigenic and genetic evolution of influenza virus.  
734 *Science* 305:371-6.
- 735 69. Lewis NS, Anderson TK, Kitikoon P, Skepner E, Burke DF, Vincent AL. 2014.  
736 Substitutions near the hemagglutinin receptor-binding site determine the antigenic  
737 evolution of influenza A H3N2 viruses in U.S. swine. *J Virol* 88:4752-63.  
738

739 **FIGURE LEGENDS**

740 **Fig. 1. Global phylogenetic analysis of H9N2 FLUAV. (A)** Maximum Likelihood phylogeny of  
741 1,316 H9 avian HA1 nucleotide sequences from the GISAID and IRD databases updated July  
742 14<sup>th</sup>, 2020, generated with RaxML followed by Garli branch length optimization. Nodes at the  
743 end of each branch are color-coded based on the geographic origin of each isolate. Amino acid  
744 substitutions using one-letter code and numbering based on H9 HA mature sequence are  
745 shown. Highlighted in black are H9 sub-lineages chosen to generate consensus HA1 region  
746 sequences and to produce chimeric H9 HA constructs with a constant HA2 region. Sub-lineages  
747 that were unsuccessful in reverse genetics are shown in grey. The h9.4.1 consensus is  
748 represented by the prototypic virus A/gf/HK/WF10/1999 (H9N2). **(B)** WebLogo by Geneious  
749 v2022.2.2 with the alignment of the consensus HA1 amino acid sequences and closest relatives  
750 in each case (under each consensus sequence) against WF10 wild-type HA1. (\*) on top of  
751 amino acid positions indicate potentially relevant antigenic amino acids. The closest relative for  
752 h9.3.9 and h9.3.7 is the same (A/dk/Hunan/1/2006). No closest relative against h9.2.4 and  
753 h9.2.3 are shown since no viable virus was obtained for those clades.

754 **Fig. 2. Antigenic maps using quail sera against H9 viruses. (A)** Schematic representation of  
755 the inoculation in quails produced with Biorender.com. Birds were inoculated with each  
756 consensus virus at day 0, and at 14dpi they were boosted with homologous inactivated-  
757 adjuvanted virus preparations. At 28dpi, quails were bled, and the antisera were obtained. **(B)**  
758 Antigenic map with spheres representing consensus viruses and squares representing the  
759 different antisera. Viruses are highlighted and colored by respective clusters (cyan, red, blue,  
760 and orange). AU distances between representative antigens from each cluster are shown next  
761 to dashed grey lines connecting them. **(C)** Antigenic map with spheres representing consensus  
762 viruses + prototypical strains (QA/HK/G1/07, DK/HK/Y280/97, and CK/HK/G9/97) and squares  
763 representing the different antisera. Viruses are highlighted and colored by respective clusters  
764 (cyan, red, blue, and orange). AU distances between representative antigens from each cluster  
765 and prototypic strains are shown next to dashed grey lines connecting them. **(D)** Antigenic map  
766 with spheres representing consensus viruses + field isolates (n=46) and squares representing  
767 the different antisera. Viruses are highlighted and colored by respective clusters (cyan, red,  
768 blue, and orange). AU distances between representative antigens from each cluster are shown  
769 next to dashed grey lines connecting them. Except for the orange antigenic h9.3.9 antigen, all  
770 other antigens that showed sera reactivity but did not fall into an antigenic cluster are shown in  
771 grey as outliers. Specific viruses are denoted by codes shown in Table 2.

772

773 **Fig. 3. Analysis of molecular signatures of antigenicity between cyan-blue antigenic**  
774 **clusters.** Transitions of H9 virus mutants carrying selected amino acid substitutions. 3D  
775 structures were generated with PyMOL and color-coded as follows: Red = amino acids in the  
776 RBS (91, 143, 173, 184, 185, and 216), cyan=WF10, and blue= h9.4.2. **(A)** WF10-9p-h9.4.2  
777 mutant with the HA-WF10 carrying substitutions at positions 72, 131, 135, 150, 180, 186, 188,  
778 198, and 217 corresponding to the h9.4.2 consensus sequence. **(B)** h9.4.2-9p-WF10 mutant  
779 with the HA-h9.4.2 modified at amino acid positions 72, 131, 135, 150, 180, 186, 188, 198, and  
780 217 corresponding to the WF10 HA sequence. **(C)** Antigenic map showing the antigenic cluster  
781 transitions of the mutants evaluated. AUs are stated adjacent to respective arrows: Dashed  
782 lines highlight the distances between the mutant and the “target” virus and between WF10  
783 (h9.4.1) and h9.4.2.

784 **Fig. 4. Cyan-orange antigenic cluster transitions of H9 virus mutants carrying selected**  
785 **amino acid substitutions.** **(A)** WF10-7p-h9.3.9a mutant with the HA-WF10 H9.4.1 and  
786 substitutions at positions 127, 131, **173**, 180, 182, 183, and 217 corresponding to the h9.3.9  
787 antigen. **(B)** The WF10-7p-h9.3.9b mutant is the same as in A, except that substitutions are at  
788 positions 127, 131, **146**, 180, 182, 183, and 217. **(C)** h9.3.9-8p-WF10 mutant with the HA-h9.3.9  
789 modified at amino acid positions 127, 131, 146, 173, 180, 182, 183, and 217, corresponding to  
790 the WF10 HA sequence. 3D structures as described in **Fig 3**, except that orange, highlights  
791 amino acids in the h9.3.9 consensus sequence. **(D)** Antigenic map showing the antigenic cluster  
792 transitions of the mutants evaluated. AUs are stated adjacent to respective arrows: Dashed  
793 lines highlight the distances between the mutant and the “target” viruses and between WF10  
794 (h9.4.1) and h9.3.9.

795 **Fig. 5. Antigenic cartography results for H9 virus mutants carrying single or double**  
796 **amino acid substitutions between WF10 h9.4.1 and h9.4.2/h9.3.5 in the WF10 HA**  
797 **backbone.** **(A)** R131K-h9.4.2; **(B)** F150L-h9.4.2; **(C)** E180A-h9.4.2 **(D)** Q217I-h9.4.2; **(E)**  
798 R131K-E180A-h9.4.2; **(F)** F150L-Q217I-h9.4.2; **(G)** G149N-h9.3.5; **(H)** F150A-h9.3.5; **(I)**  
799 G149N-F150A-h9.3.5. AUs and 3D renderings are color-coded as described in **Fig. 3**. Only the  
800 E180A-h9.4.2 (cyan to blue) and the R131K/E180A-h9.4.2 (cyan to blue) mutants showed  
801 cluster transitions.

802 **Fig. 6. Antigenic cartography results for H9 virus mutants carrying single or double**  
803 **amino acid substitutions between WF10 h9.4.1 and h9.3.9 in the WF10 HA backbone.** **(A)**



804 F150D-h9.3.9; **(B)** Q217M-h9.3.9; **(C)** F150D-E180T-h9.3.9; **(D)** F150D-Q217M-h9.3.9; **(E)**  
805 E180T-Q217M-h9.3.9. AU units and 3D renderings are color-coded, as described in **Fig. 4**.  
806

**A**

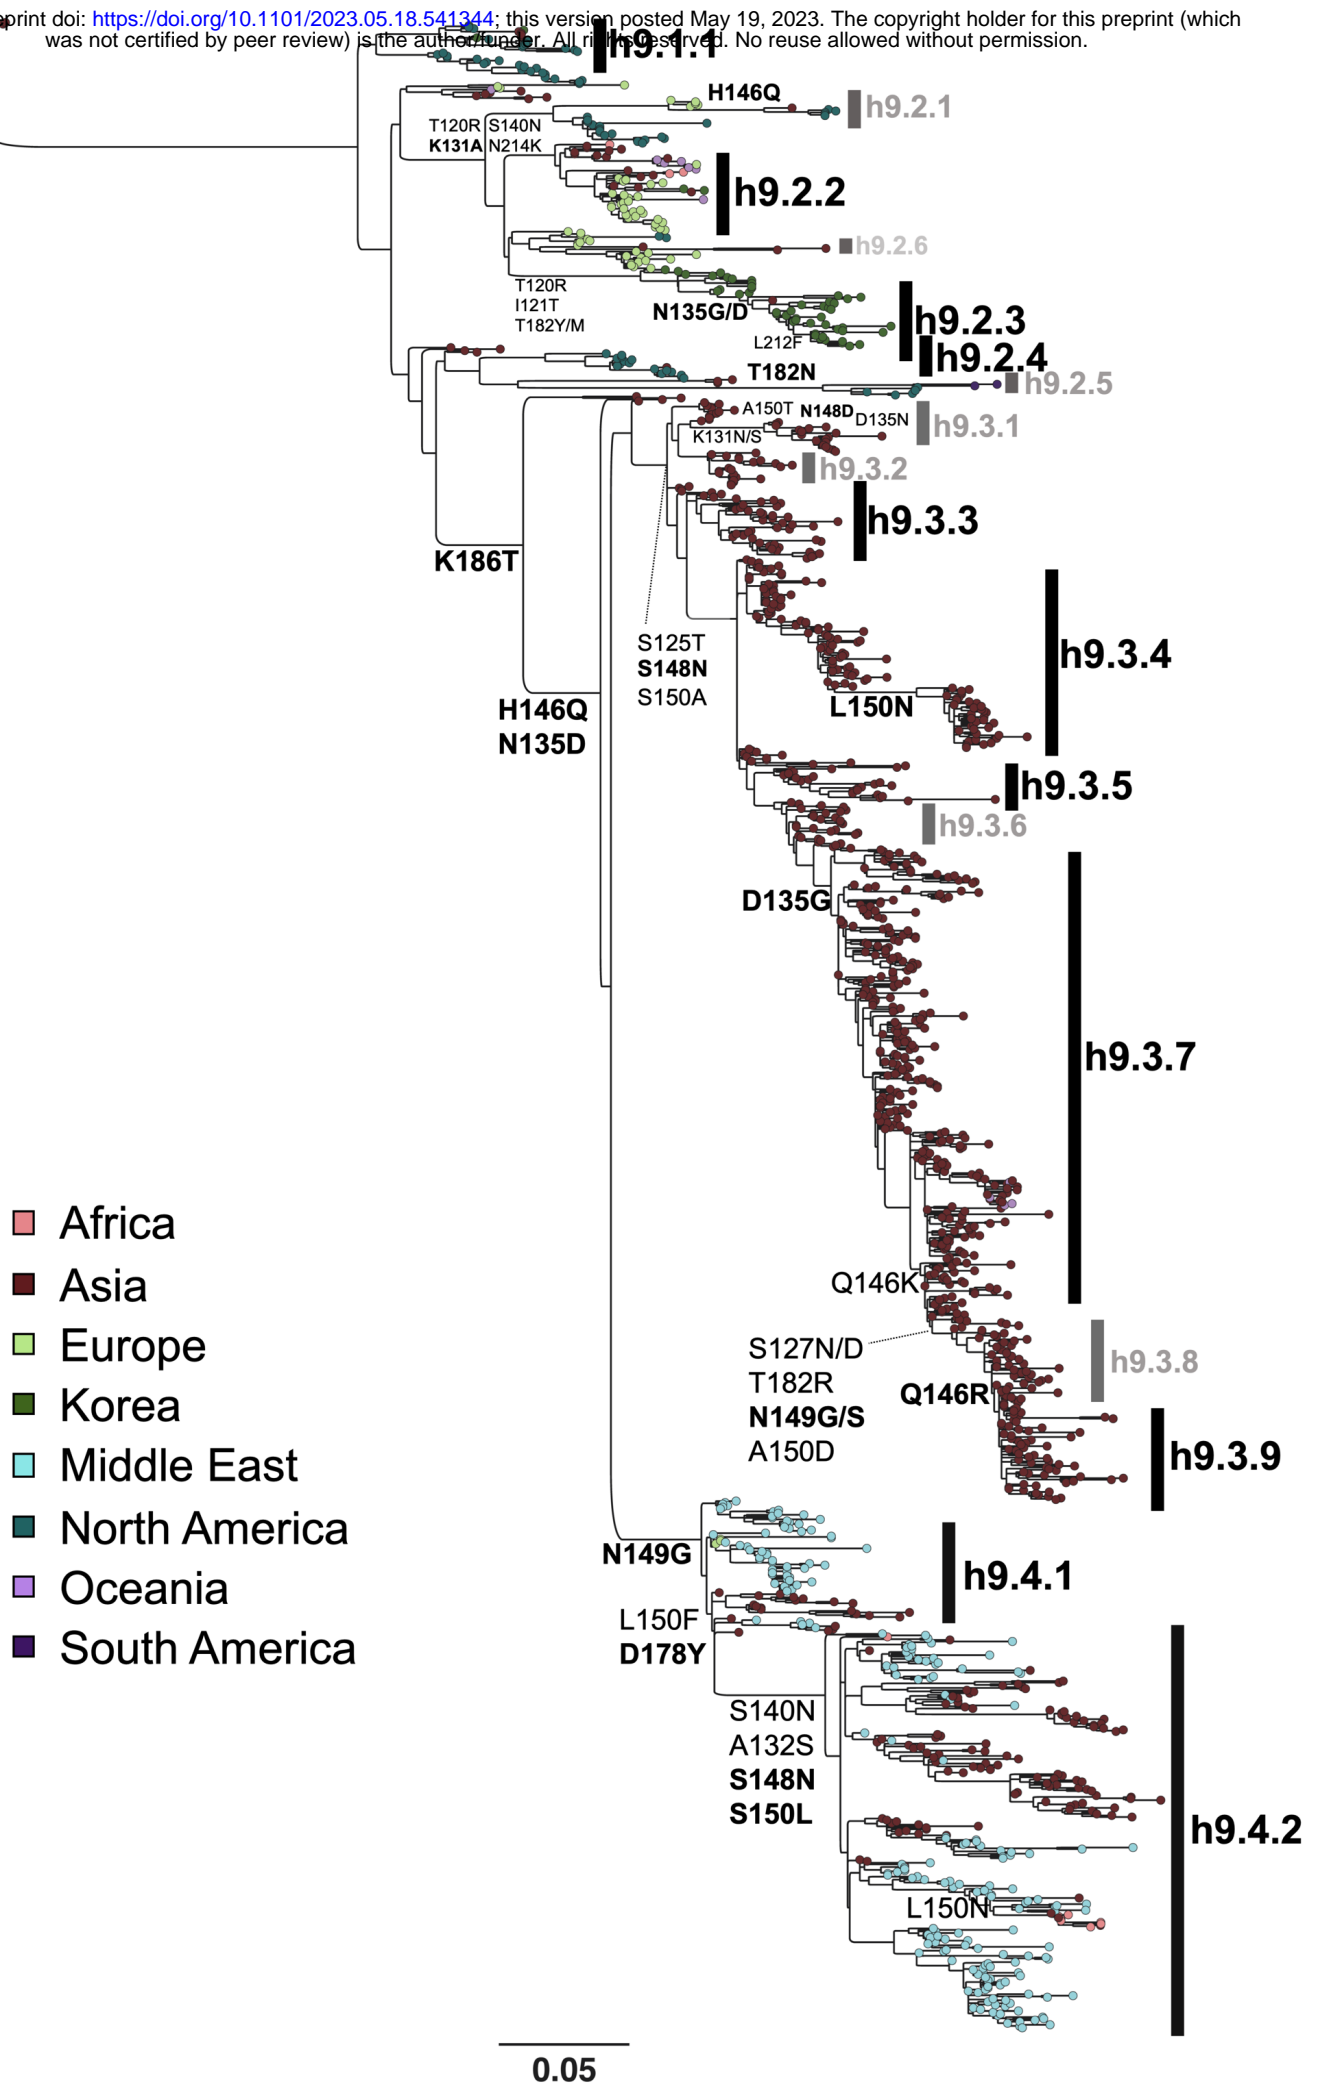

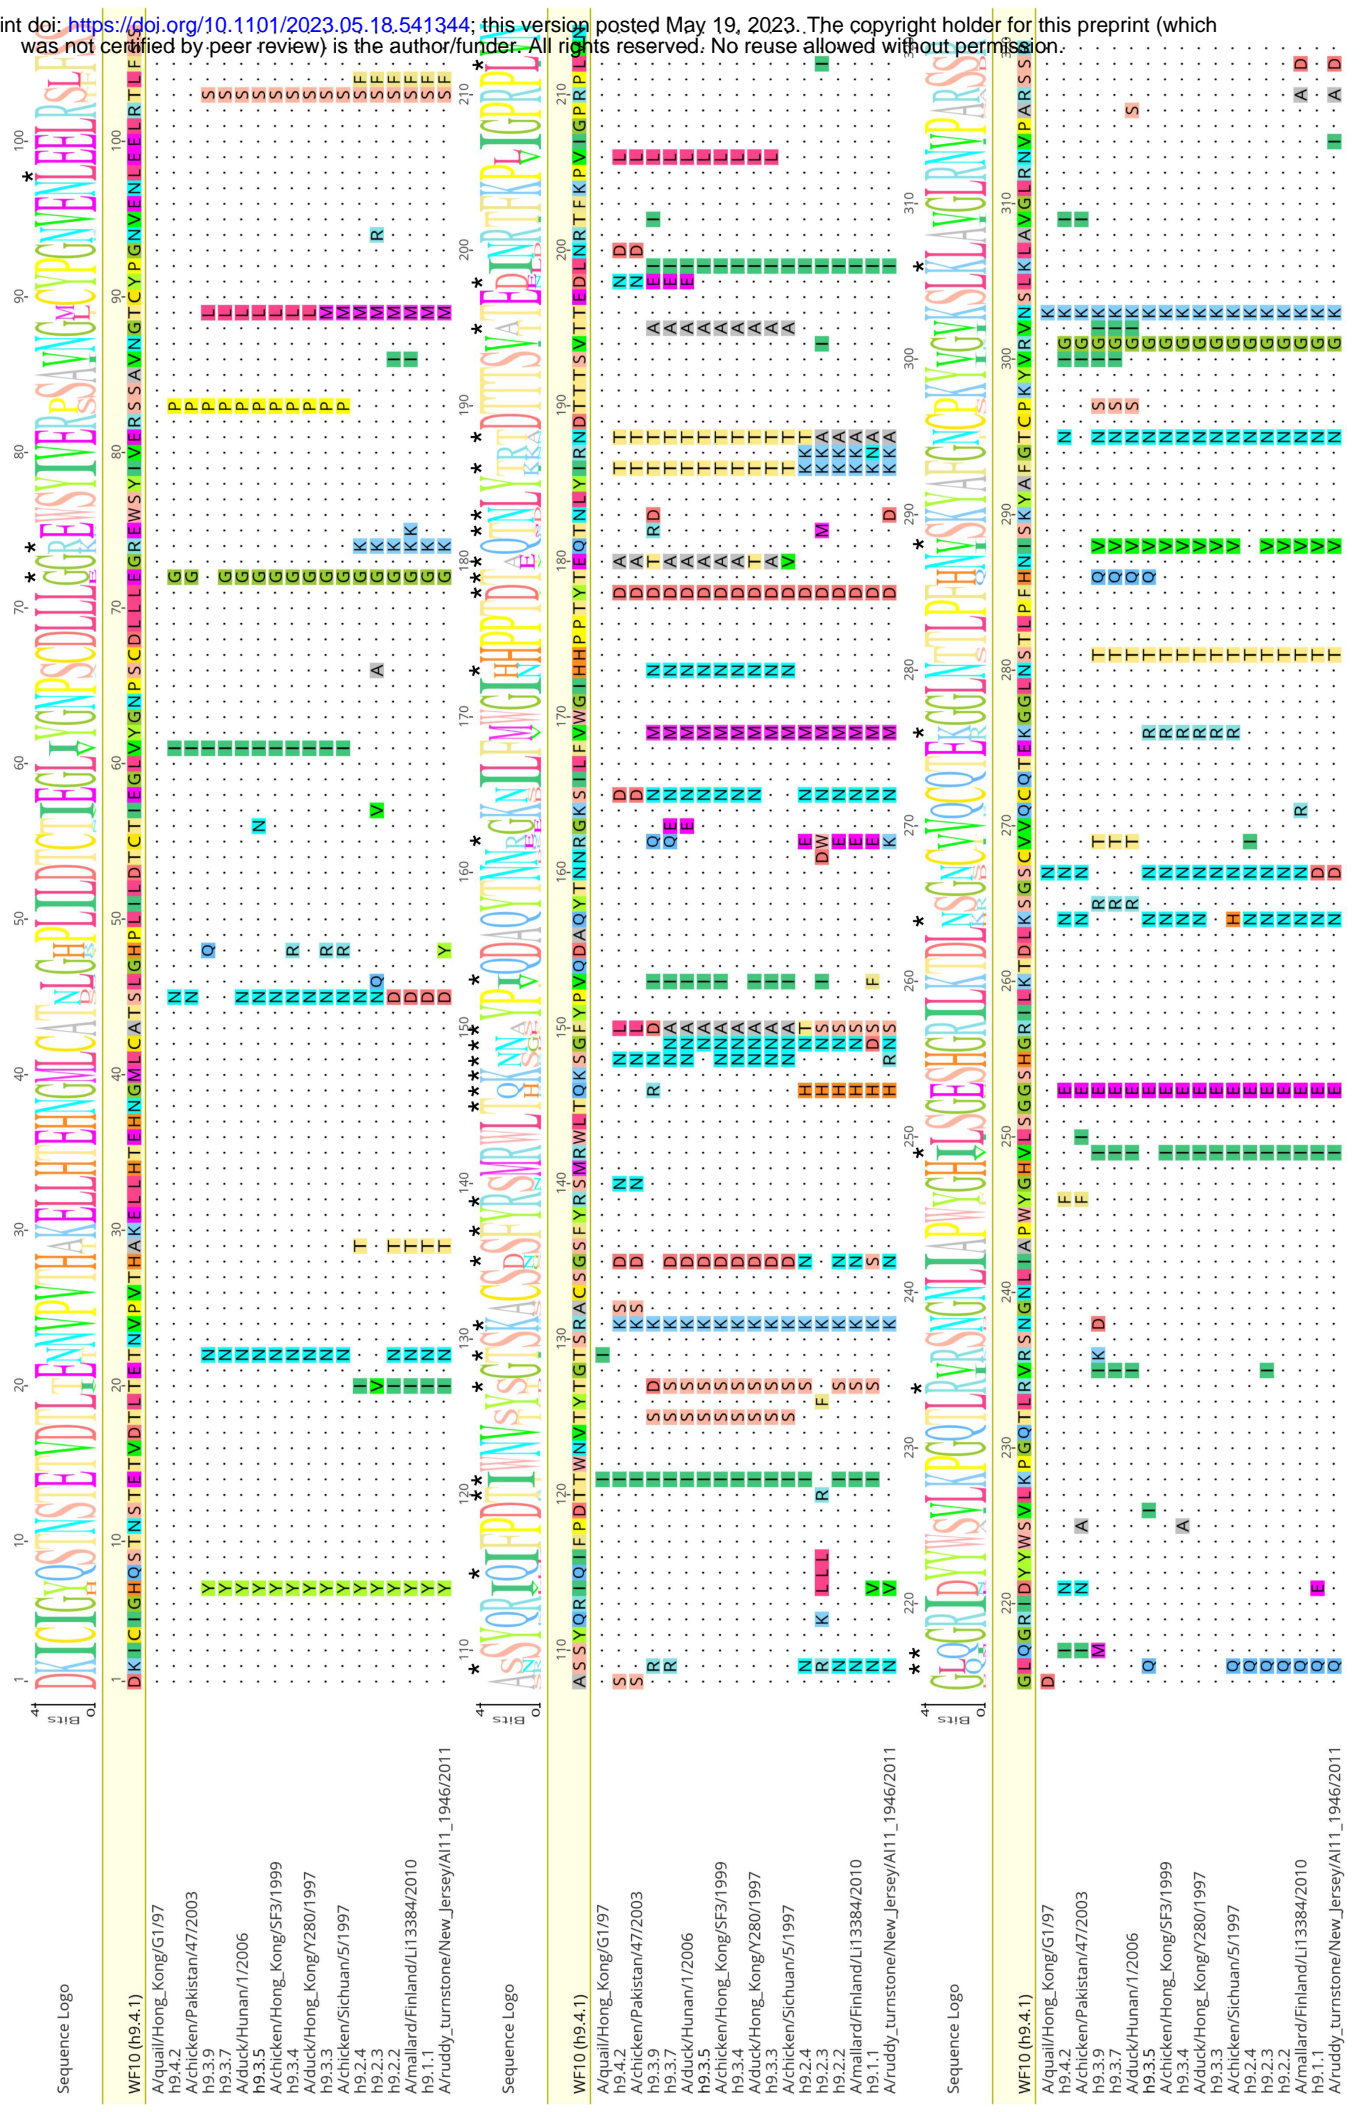

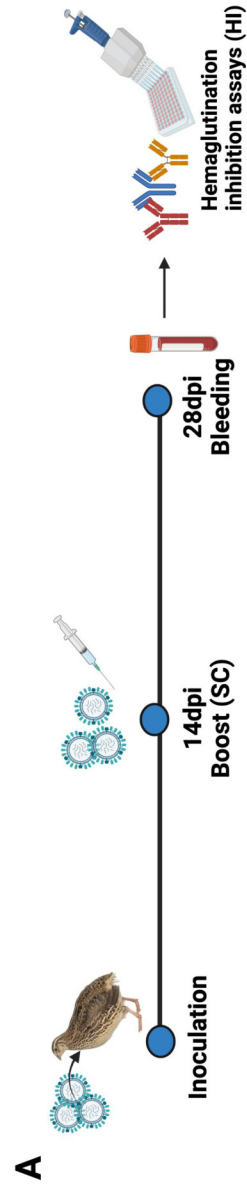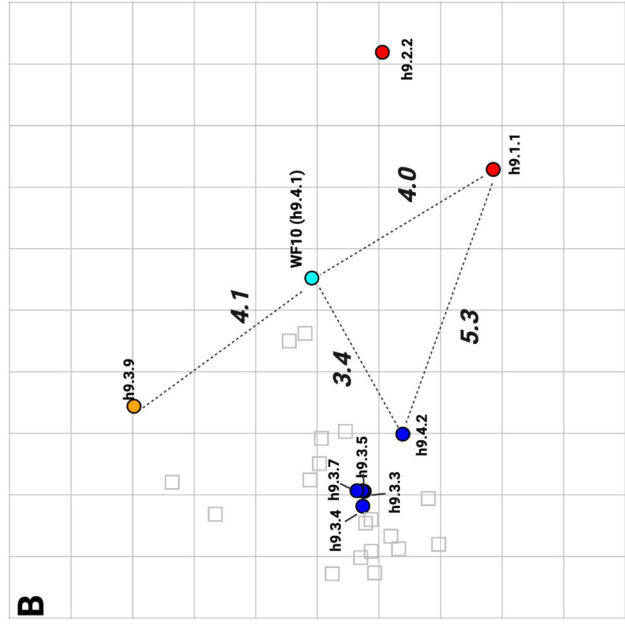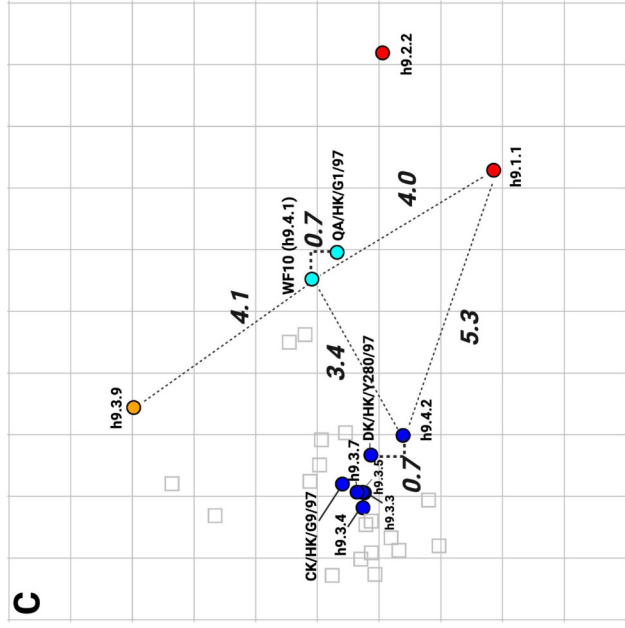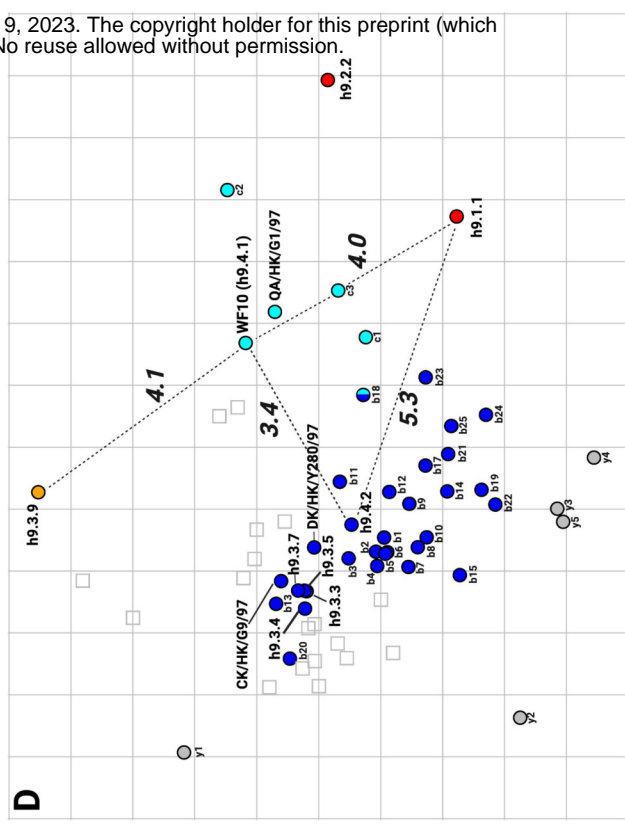



**A**

WF10-9p-h9.4.2

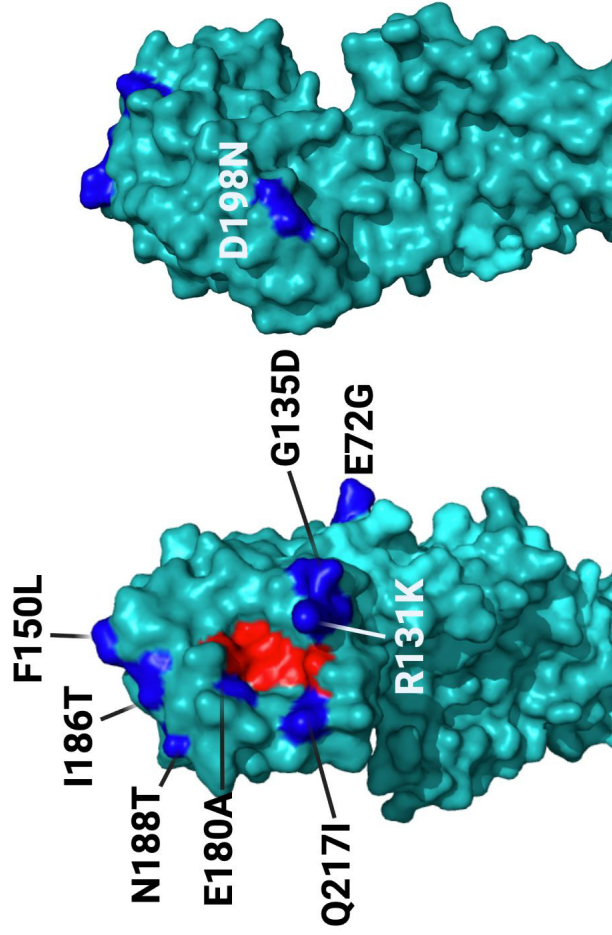**B**

h9.4.2-9p-WF10

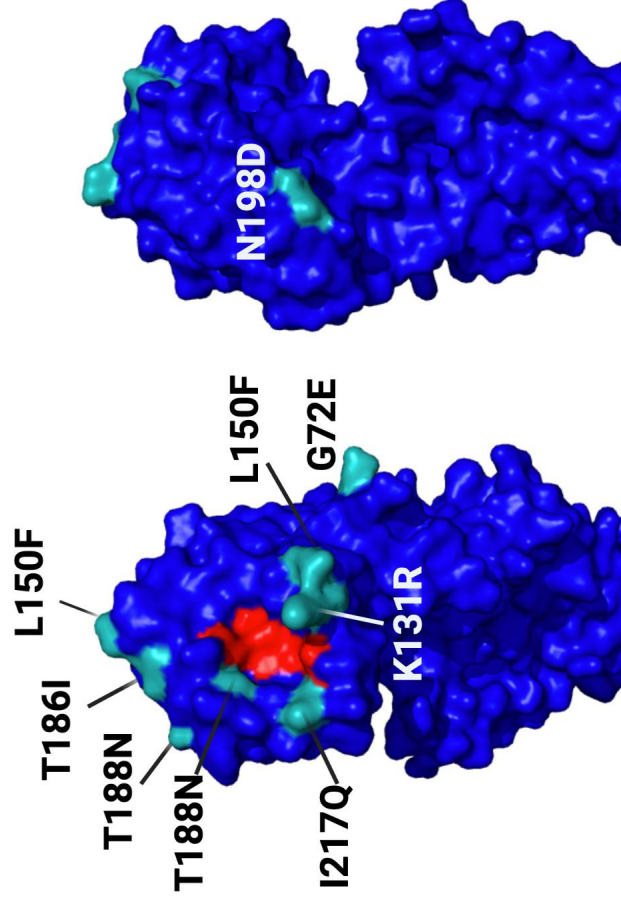**C**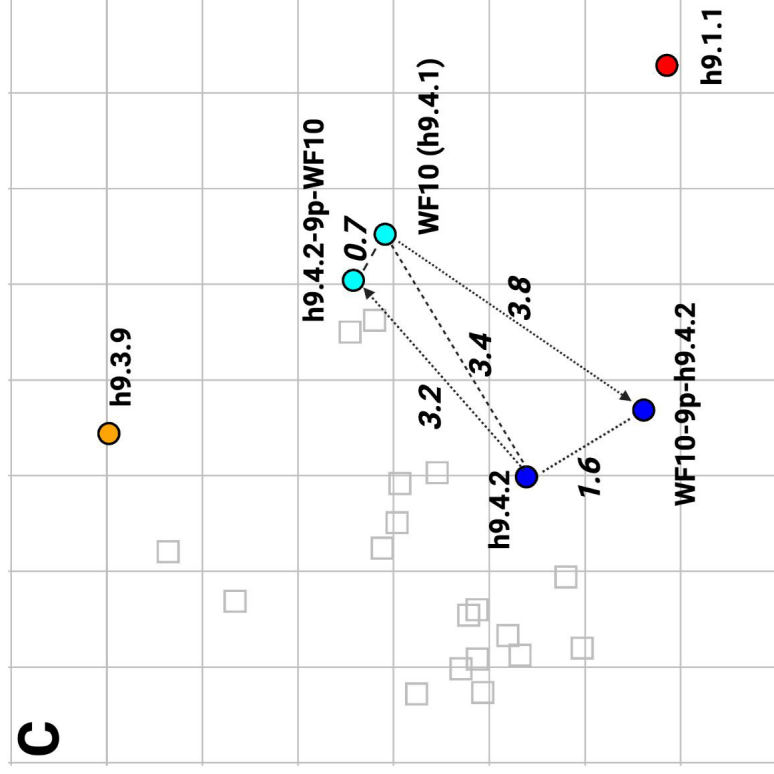

**C**

h9.3.9-8p-WF10

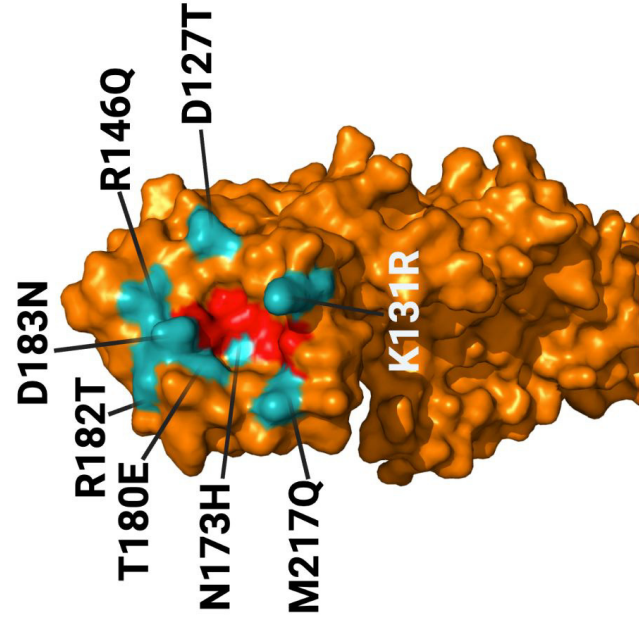

**B**

WF10-7p-h9.3.9b

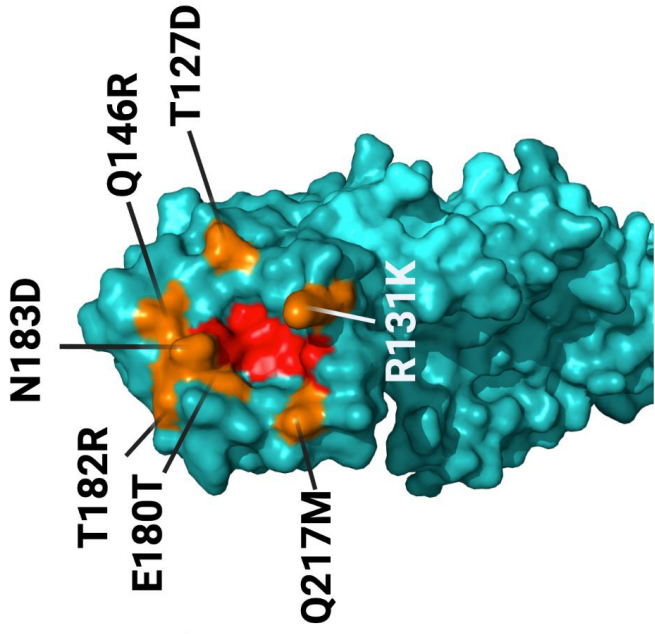

**A**

WF10-7p-h9.3.9a

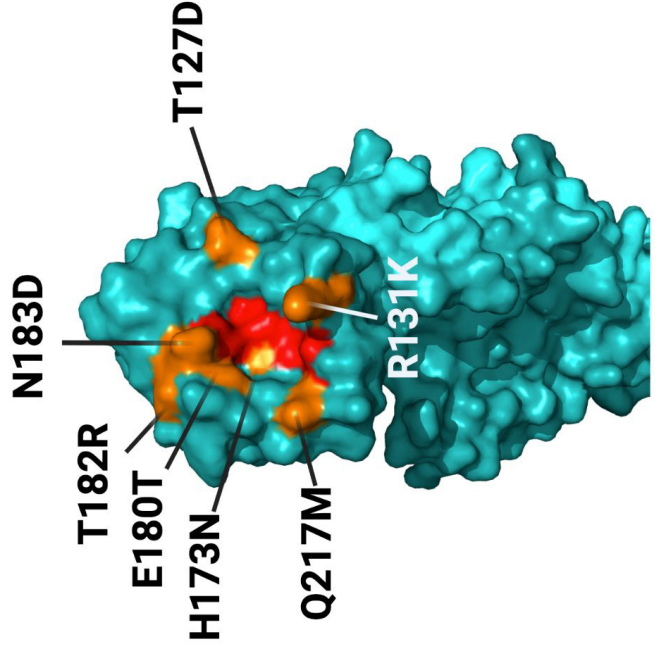

**D**

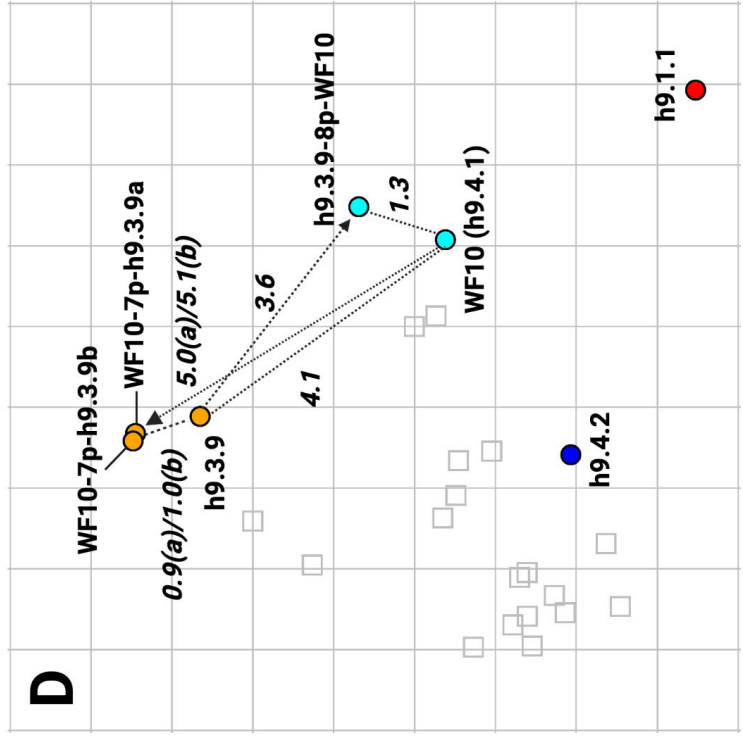



**131-h9.4.2**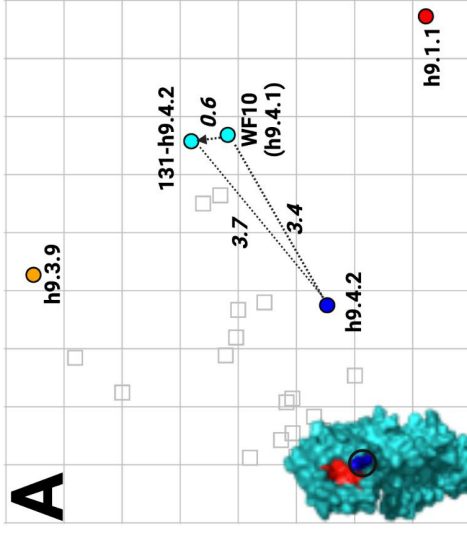**150-h9.4.2**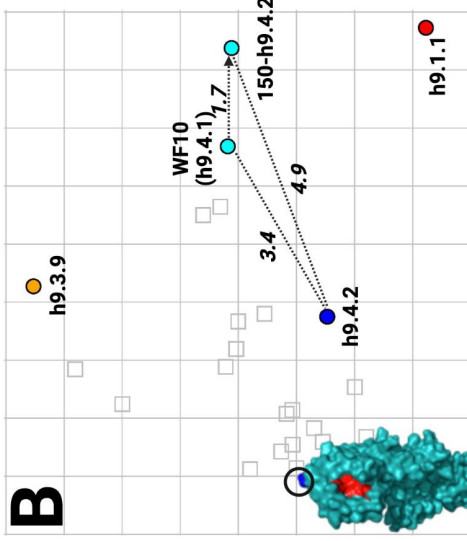**180-h9.4.2**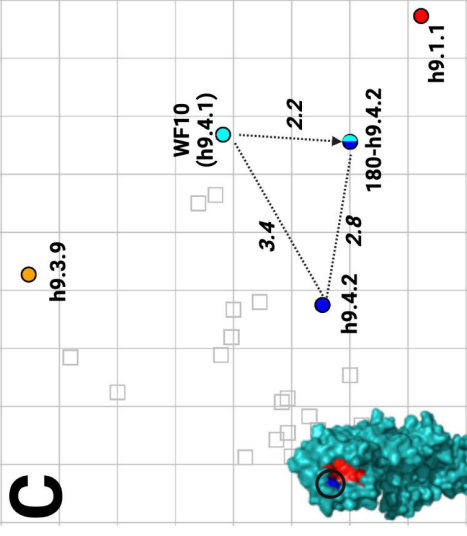**217-h9.4.2**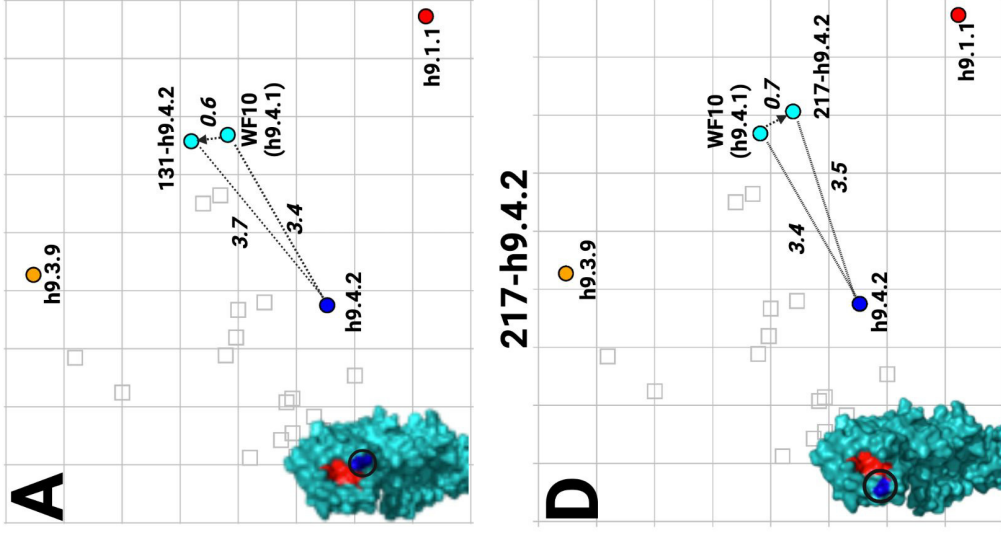**131-180-h9.4.2**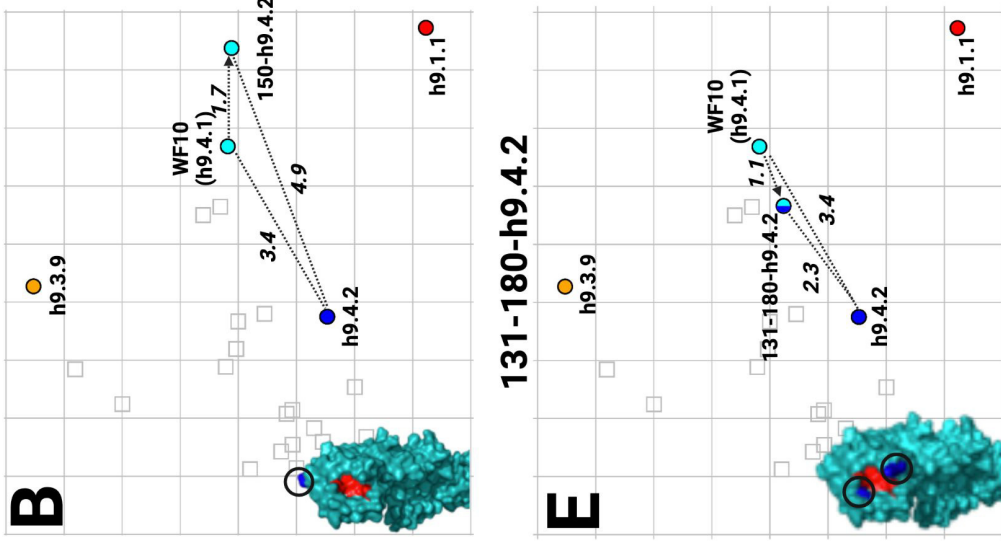**150-217-h9.4.2**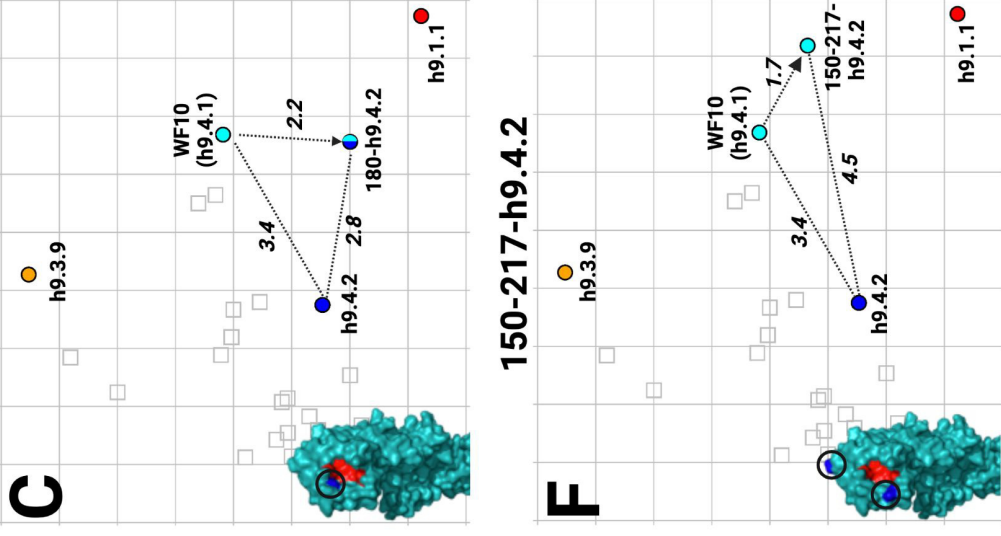**149-h9.3.5**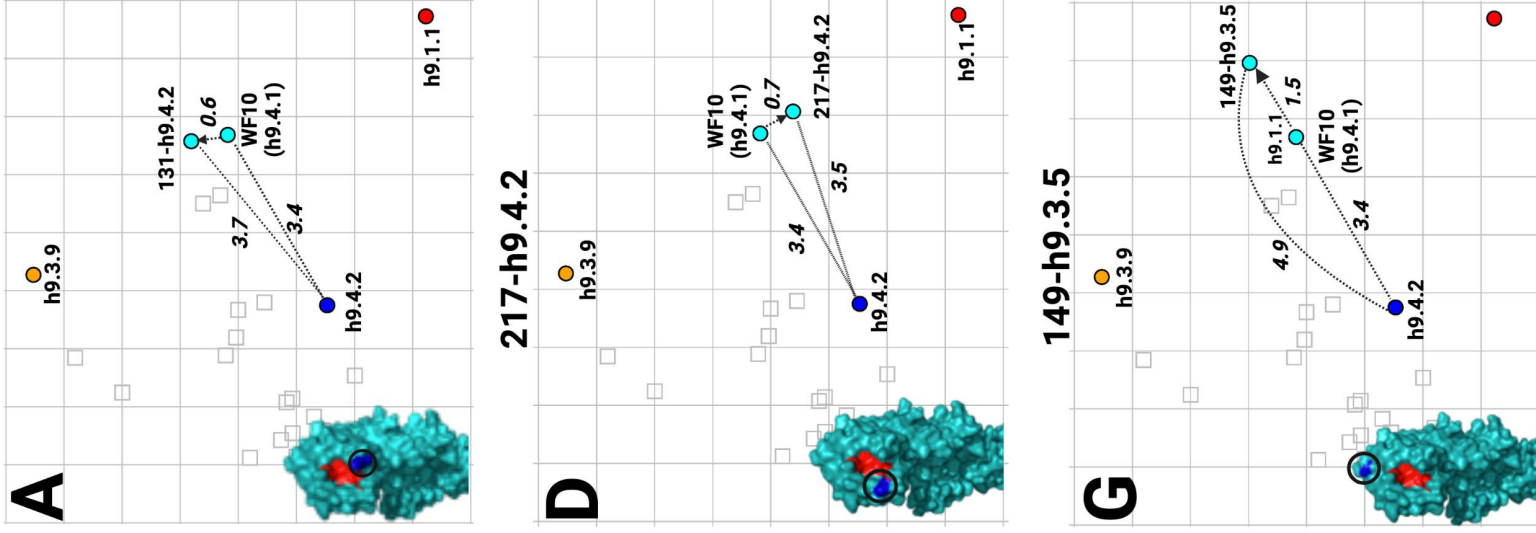**150-h9.3.5**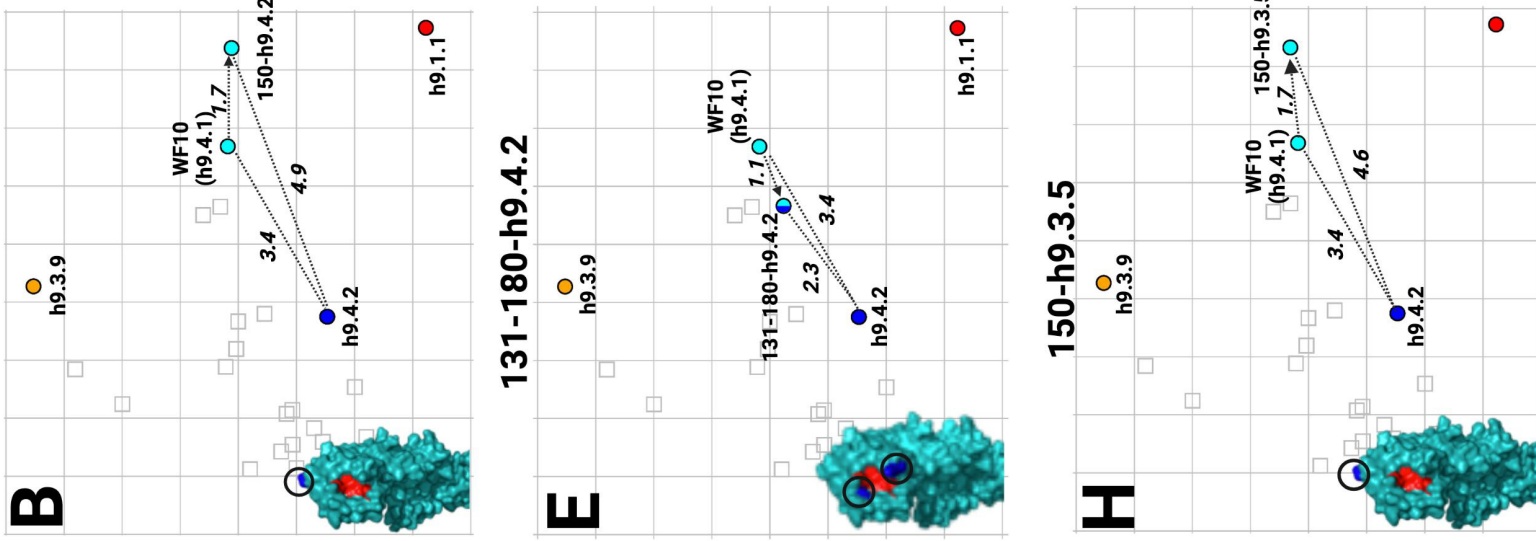**149-150-h9.3.5**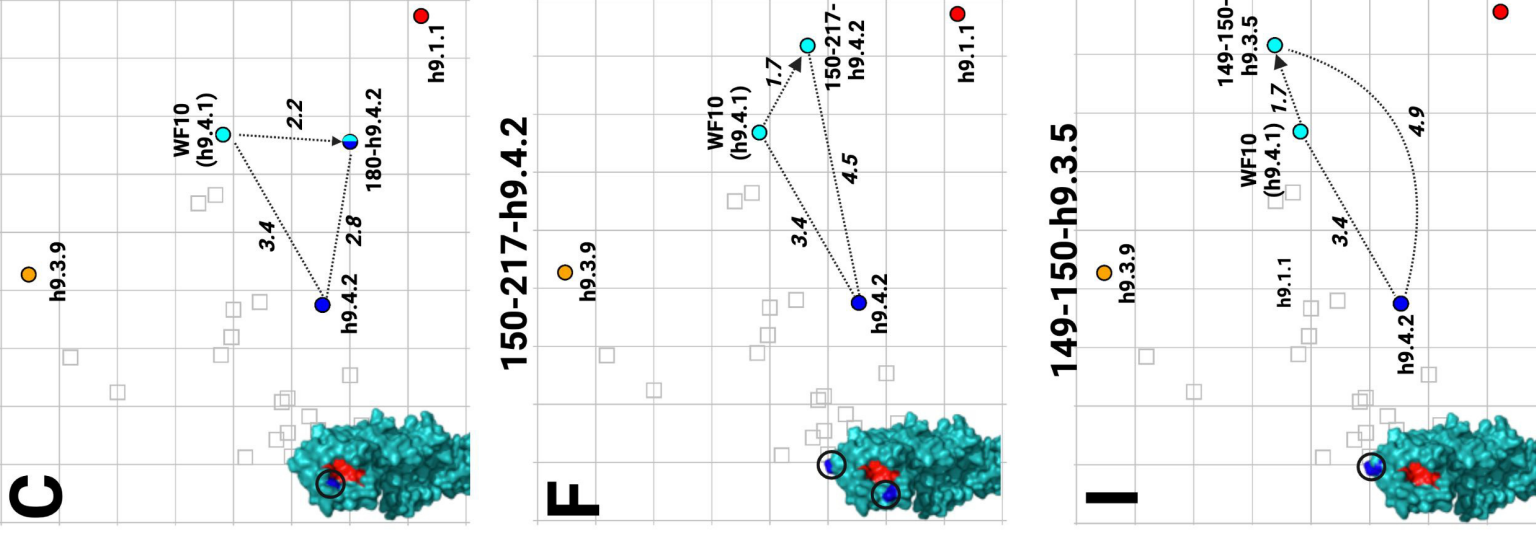

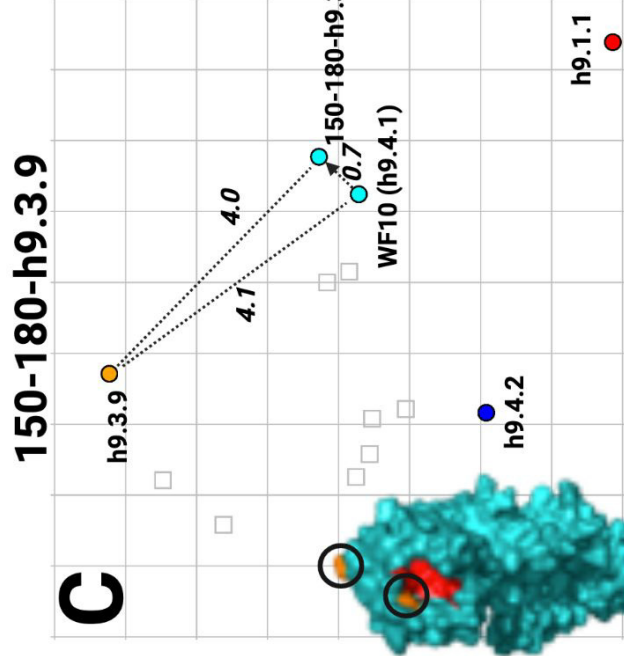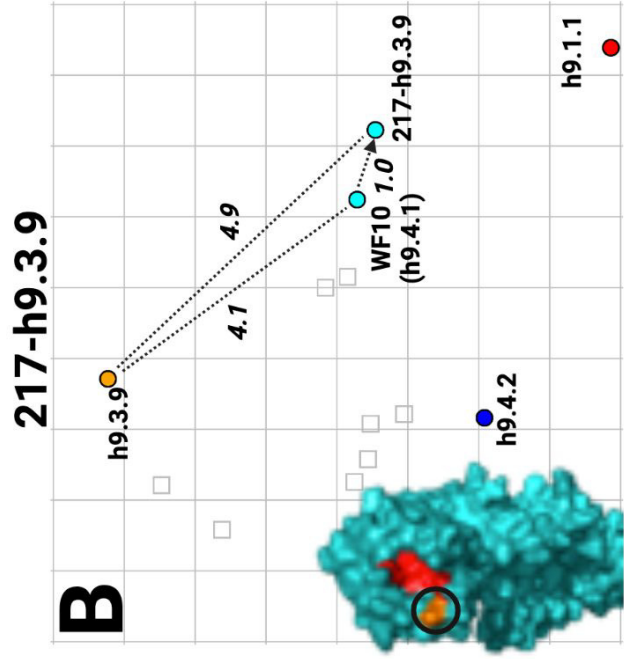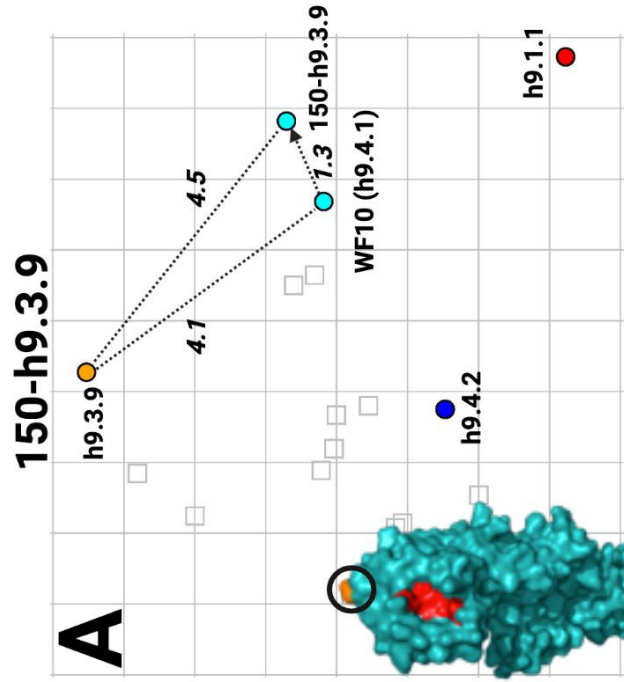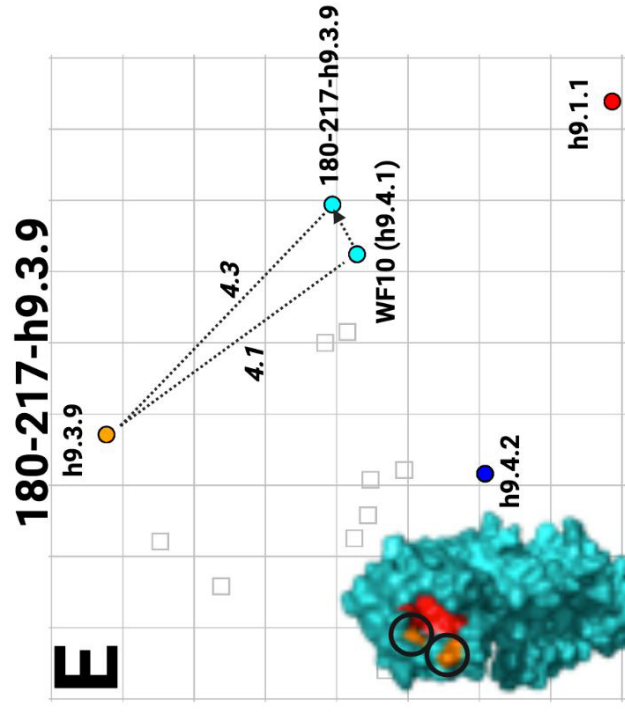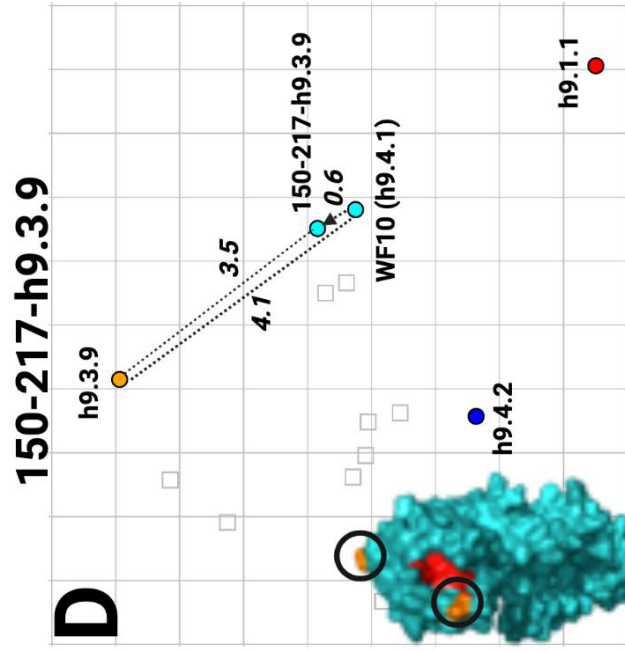

**Table 1.** Cross-HI titers against chimeric HA-WF10 (H9N2) viruses using quail sera.

| Virus         | Quail Sera* |          |          |          |          |          |          |          |          |          |          |          |          |          |          |          |                 |                 |
|---------------|-------------|----------|----------|----------|----------|----------|----------|----------|----------|----------|----------|----------|----------|----------|----------|----------|-----------------|-----------------|
|               | h9.1.1_1    | h9.1.1_2 | h9.2.2_1 | h9.2.2_2 | h9.4.2_1 | h9.4.2_2 | h9.3.3_1 | h9.3.3_2 | h9.3.4_1 | h9.3.4_2 | h9.3.5_1 | h9.3.5_2 | h9.3.7_1 | h9.3.7_2 | h9.3.9_1 | h9.3.9_2 | WF10 (h9.4.1)_1 | WF10 (h9.4.1)_2 |
| h9.1.1        | 80          | 160      | <20      | 40       | <20      | <20      | <20      | <20      | <20      | <20      | <20      | <20      | <20      | <20      | <20      | <20      | <20             | 40              |
| h9.2.2        | <20         | <20      | 40       | 160      | <20      | <20      | <20      | <20      | <20      | <20      | <20      | <20      | <20      | <20      | <20      | <20      | <20             | <20             |
| h9.4.2        | 160         | 320      | 320      | 640      | 2560     | 2560     | 1280     | 640      | 2560     | 640      | 640      | 1280     | 640      | 320      | 320      | 160      | 2560            | 1280            |
| h9.3.3        | 160         | 640      | 640      | 1280     | 1280     | 5120     | 5120     | 2560     | 2560     | 2560     | 1280     | 2560     | 2560     | 2560     | 640      | 320      | 640             | 320             |
| h9.3.4        | 160         | 640      | 640      | 1280     | 1280     | 5120     | 5120     | 2560     | 5120     | 5120     | 2560     | 5120     | 2560     | 2560     | 640      | 320      | 640             | 320             |
| h9.3.5        | 160         | 320      | 640      | 640      | 640      | 2560     | 2560     | 2560     | 2560     | 2560     | 2560     | 2560     | 1280     | 1280     | 320      | 160      | 160             | 160             |
| h9.3.7        | 160         | 640      | 640      | 1280     | 1280     | 5120     | 2560     | 2560     | 5120     | 5120     | 2560     | 2560     | 2560     | 1280     | 640      | 640      | 640             | 320             |
| h9.3.9        | 40          | 160      | 160      | 160      | 80       | 40       | 160      | 80       | 160      | 160      | 80       | 80       | 40       | 40       | 5120     | 5120     | 1280            | 640             |
| WF10 (h9.4.1) | 160         | 160      | 160      | 160      | 160      | 160      | 320      | 80       | 160      | 160      | 80       | 160      | 80       | 80       | 160      | 320      | 2560            | 1280            |

\* Sera was generated by pooling serum samples from 3 individual quail, 2 pools/virus.

**Table 2.** Cluster location and antigenic distances of consensus viruses and field isolates.

| <b>Virus</b>                       | <b>Closest Centroid</b> | <b>Antigenic distance</b> | <b>Label</b>  |
|------------------------------------|-------------------------|---------------------------|---------------|
| <b>h9.1.1</b>                      | <b>h9.1.1</b>           | <b>0</b>                  | <b>h9.1.1</b> |
| <b>h9.2.2</b>                      | <b>h9.1.1</b>           | 2.9                       | <b>h9.2.2</b> |
| A/ma/Finland/LI13384/2010c         | <b>h9.1.1</b>           | 2.6                       | <b>r1</b>     |
| A/rt/New Jersey/AI11-1946/2011     | <b>h9.1.1</b>           | 0.9                       | <b>r2</b>     |
| A/sh/Delaware/9/1996               | <b>h9.1.1</b>           | 2.0                       | <b>r3</b>     |
| A/ph/Republic of Ireland/PV18/1997 | <b>h9.1.1</b>           | 0.3                       | <b>r4</b>     |
| A/dk/Hong Kong/702/1979            | <b>h9.1.1</b>           | 1.4                       | <b>r5</b>     |
| A/sh/Delaware/277/1999             | <b>h9.1.1</b>           | 0.5                       | <b>r6</b>     |
| A/tk/USA/6707-1/1996               | <b>h9.1.1</b>           | 1.2                       | <b>r7</b>     |
| A/ck/Shijiazhuang/2/1999           | <b>h9.1.1</b>           | 1.0                       | <b>r8</b>     |
| A/qa/Arkansas/29209/1993           | <b>h9.1.1</b>           | 1.3                       | <b>r9</b>     |
| A/ck/Sichuan/5/1997                | <b>h9.1.1</b>           | 2.7                       | <b>r10</b>    |
| A/ck/Jordan/554/2003               | <b>h9.1.1</b>           | 1.7                       | <b>r11</b>    |
| <b>h9.4.2</b>                      | <b>h9.4.2</b>           | <b>0</b>                  | <b>h9.4.2</b> |
| <b>h9.3.3</b>                      | <b>h9.4.2</b>           | 1.3                       | <b>h9.3.3</b> |
| <b>h9.3.4</b>                      | <b>h9.4.2</b>           | 1.5                       | <b>h9.3.4</b> |
| <b>h9.3.5</b>                      | <b>h9.4.2</b>           | 1.3                       | <b>h9.3.5</b> |
| <b>h9.3.7</b>                      | <b>h9.4.2</b>           | 1.4                       | <b>h9.3.7</b> |
| A/ck/Hong Kong/G9/1997             | <b>h9.4.2</b>           | 1.4                       | <b>G9</b>     |
| A/dk/Hong Kong/Y280/1997           | <b>h9.4.2</b>           | 0.7                       | <b>Y280</b>   |
| A/ck/Bangladesh/301/2007           | <b>h9.4.2</b>           | 0.6                       | <b>b1</b>     |
| A/ck/Saudi Arabia/3489V08-50/2008  | <b>h9.4.2</b>           | 0.6                       | <b>b2</b>     |
| A/ck/Tunisia/812/2012              | <b>h9.4.2</b>           | 0.5                       | <b>b3</b>     |
| A/ck/Pakistan/47/2003              | <b>h9.4.2</b>           | 0.8                       | <b>b4</b>     |
| A/ck/Saudi Arabia/3489V08-44/2006  | <b>h9.4.2</b>           | 0.7                       | <b>b5</b>     |
| A/ck/Nepal/PT22/2013               | <b>h9.4.2</b>           | 0.7                       | <b>b6</b>     |
| A/ck/Bangladesh/262-O-SUN-1/2016   | <b>h9.4.2</b>           | 1.1                       | <b>b7</b>     |
| A/ck/Saudi Arabia/A/2010           | <b>h9.4.2</b>           | 1.1                       | <b>b8</b>     |
| A/ck/Tunisia/12/2010               | <b>h9.4.2</b>           | 1.0                       | <b>b9</b>     |
| A/ck/India/1/2003                  | <b>h9.4.2</b>           | 1.2                       | <b>b10</b>    |
| A/ck/Germany/K1009/1998            | <b>h9.4.2</b>           | 0.7                       | <b>b11</b>    |
| A/ck/Pakistan/UDL 7/2008           | <b>h9.4.2</b>           | 0.8                       | <b>b12</b>    |
| A/ck/Hong Kong/SF3/1999            | <b>h9.4.2</b>           | 1.7                       | <b>b13</b>    |
| A/ck/Iran/AIV 1/2003               | <b>h9.4.2</b>           | 1.6                       | <b>b14</b>    |
| A/ck/Iraq/30/2011                  | <b>h9.4.2</b>           | 1.9                       | <b>b15</b>    |
| A/ck/Afghanistan/329V09/2008       | <b>h9.4.2</b>           | 1.5                       | <b>b17</b>    |

|                                          |               |     |               |
|------------------------------------------|---------------|-----|---------------|
| A/qa/United Arab Emirates/302/2001       | <b>h9.4.2</b> | 2.1 | <b>b18</b>    |
| A/ck/Saudi Arabia/3489V08/2005           | <b>h9.4.2</b> | 2.2 | <b>b19</b>    |
| A/dk/Hunan/1/2006                        | <b>h9.4.2</b> | 2.4 | <b>b20</b>    |
| A/av/Middle East/2/1998                  | <b>h9.4.2</b> | 1.9 | <b>b21</b>    |
| A/ck/Saudi Arabia/3489V08-47/2007        | <b>h9.4.2</b> | 2.3 | <b>b22</b>    |
| A/ck/Nepal/1-220/2013                    | <b>h9.4.2</b> | 2.7 | <b>b23</b>    |
| A/ck/Guangdong/11/1997                   | <b>h9.4.2</b> | 2.8 | <b>b24</b>    |
| A/ty/Israel/1266/2003                    | <b>h9.4.2</b> | 2.3 | <b>b25</b>    |
| <b>A/guinea fowl/Hong Kong/WF10/1999</b> | <b>WF10</b>   | 0   | <b>WF10</b>   |
| A/qa/Hong Kong/G1/1997                   | <b>WF10</b>   | 1   | <b>G1</b>     |
| A/ck/Saudi Arabia/S11A/2003              | <b>WF10</b>   | 2.4 | <b>c1</b>     |
| A/ty/Netherlands/11015452/2012           | <b>WF10</b>   | -   | <b>c2</b>     |
| A/qa/Hong Kong/A28945/88                 | <b>WF10</b>   | 1.7 | <b>c3</b>     |
| <b>h9.3.9</b>                            | <b>h9.3.9</b> | -   | <b>orange</b> |
| A/ck/Beijing/8/1998                      | -             | -   | <b>y1</b>     |
| A/ck/Hebei/3/1998                        | -             | -   | <b>y2</b>     |
| A/ck/United Arab Emirates/H4TR/2011      | -             | -   | <b>y3</b>     |
| A/ck/Libya/D31 TRACH/2006                |               |     | <b>y4</b>     |
| A/ck/Jordan/901-F5/2003                  |               |     | <b>y5</b>     |
| <b>A/ck/North_Korea/99029/1999</b>       | -             | -   | <b>Black</b>  |
| <b>A/ck/Tunisia/345/2011</b>             | -             | -   | <b>Black</b>  |
| <b>A/dk/Hong_Kong/448/1978</b>           | -             | -   | <b>Black</b>  |
| <b>A/mallard/England/7798_6499/2006</b>  | -             | -   | <b>Black</b>  |
| <b>A/ql/Saudi_Arabia/489_46v08/2006</b>  | -             | -   | <b>Black</b>  |

**a**Determined by antigenic analysis through ACMACS. **b**One unit of antigenic distance is equal to a 2-fold difference in the HI assay

**c**All virus strains are of the H9N2 subtype except where noted. \*Not Tested; 1\*Non cross reactive against the panel of antisera  
Animal species acronyms dl=duck. ck=chicken, ty=turkey, ph=pheasant, qa=quail, mal=mallard, rt= ruddy turnstone, sh=shorebird, av=avian.

**Table 3.** Antigenic distances between consensus viruses and different field isolates.

|                                          | WF10 | h9.4.2 | h9.3.3 | h9.3.4 | h9.3.5 | h9.3.7 | h9.3.9 | h9.1.1 | h9.2.2 |
|------------------------------------------|------|--------|--------|--------|--------|--------|--------|--------|--------|
| <b>A/guinea fowl/Hong Kong/WF10/1999</b> | 0.0  | 3.4    | 4.1    | 4.3    | 4.1    | 4.1    | 4.1    | 4.0    | 4.5    |
| h9.4.2                                   | 3.4  | 0.0    | 1.3    | 1.6    | 1.3    | 1.4    | 5.1    | 5.3    | 7.2    |
| h9.3.3                                   | 4.1  | 1.3    | 0.0    | 0.3    | 0.1    | 0.1    | 4.6    | 6.5    | 8.3    |
| h9.3.4                                   | 4.3  | 1.6    | 0.3    | 0.0    | 0.3    | 0.3    | 4.7    | 6.8    | 8.5    |
| h9.3.5                                   | 4.1  | 1.3    | 0.1    | 0.3    | 0.0    | 0.1    | 4.6    | 6.5    | 8.3    |
| h9.3.7                                   | 4.1  | 1.4    | 0.1    | 0.3    | 0.1    | 0.0    | 4.5    | 6.6    | 8.3    |
| h9.3.9                                   | 4.1  | 5.1    | 4.6    | 4.7    | 4.6    | 4.5    | 0.0    | 8.1    | 8.1    |
| h9.1.1                                   | 4.0  | 5.3    | 6.5    | 6.8    | 6.5    | 6.6    | 8.1    | 0.0    | 2.9    |
| h9.2.2                                   | 4.5  | 7.2    | 8.3    | 8.5    | 8.3    | 8.3    | 8.1    | 2.9    | 0.0    |
| <b>A/av/Middle East/2/1998</b>           | 3.7  | 1.9    | 3.2    | 3.4    | 3.2    | 3.3    | 6.6    | 3.8    | 6.3    |
| <b>A/ck/Afghanistan/329V09/2008</b>      | 3.5  | 1.5    | 2.8    | 3.0    | 2.8    | 2.9    | 6.3    | 4.1    | 6.4    |
| <b>A/ck/Bangladesh/262-O-SUN-1/2016</b>  | 4.5  | 1.1    | 1.7    | 1.8    | 1.7    | 1.8    | 6.1    | 5.7    | 8.0    |
| <b>A/ck/Bangladesh/301/2007</b>          | 3.9  | 0.6    | 1.5    | 1.7    | 1.5    | 1.6    | 5.6    | 5.3    | 7.4    |
| <b>A/ck/Beijing/8/1998</b>               | 6.7  | 4.6    | 3.3    | 3.0    | 3.3    | 3.2    | 4.8    | 9.7    | 11.1   |
| <b>A/ck/Germany/K1009/1998</b>           | 2.7  | 0.7    | 1.8    | 2.1    | 1.8    | 1.9    | 4.9    | 4.7    | 6.5    |
| <b>A/ck/Guangdong/11/1997</b>            | 4.1  | 2.8    | 4.1    | 4.3    | 4.1    | 4.2    | 7.3    | 3.2    | 6.0    |
| <b>A/ck/Hebei/3/1998</b>                 | 7.5  | 4.1    | 4.0    | 3.9    | 4.0    | 4.1    | 8.6    | 8.2    | 10.8   |
| <b>A/ck/Hong Kong/G9/1997</b>            | 3.9  | 1.5    | 0.4    | 0.6    | 0.4    | 0.3    | 4.2    | 6.5    | 8.1    |
| <b>A/ck/Hong Kong/SF3/1999</b>           | 4.2  | 1.8    | 0.5    | 0.5    | 0.5    | 0.4    | 4.2    | 6.9    | 8.5    |
| <b>A/ck/India/1/2003</b>                 | 4.3  | 1.2    | 2.1    | 2.3    | 2.2    | 2.2    | 6.3    | 5.2    | 7.6    |
| <b>A/ck/Iran/AIV 1/2003</b>              | 4.0  | 1.6    | 2.8    | 3.0    | 2.8    | 2.9    | 6.6    | 4.4    | 6.9    |
| <b>A/ck/Iraq/30/2011</b>                 | 5.1  | 1.9    | 2.5    | 2.6    | 2.5    | 2.6    | 6.9    | 5.8    | 8.2    |
| <b>A/ck/Jordan/554/2003</b>              | 3.2  | 3.5    | 4.8    | 5.1    | 4.8    | 4.9    | 7.1    | 1.8    | 4.4    |
| <b>A/ck/Jordan/901-F5/2003</b>           | 5.9  | 3.4    | 4.3    | 4.4    | 4.3    | 4.4    | 8.5    | 5.2    | 8.1    |
| <b>A/ck/Libya/D31 TRACH/2006</b>         | 5.9  | 4.1    | 5.1    | 5.3    | 5.1    | 5.2    | 9.0    | 4.5    | 7.5    |
| <b>A/ck/Nepal/1-220/2013</b>             | 3.0  | 2.7    | 4.0    | 4.2    | 3.9    | 4.0    | 6.5    | 2.6    | 5.1    |
| <b>A/ck/Nepal/PT22/2013</b>              | 4.1  | 0.7    | 1.4    | 1.6    | 1.4    | 1.5    | 5.7    | 5.6    | 7.7    |
| <b>A/ck/Pakistan/47/2003</b>             | 4.2  | 0.8    | 1.2    | 1.3    | 1.2    | 1.3    | 5.6    | 5.8    | 7.9    |
| <b>A/ck/Pakistan/UDL 7/2008</b>          | 3.3  | 0.8    | 2.1    | 2.3    | 2.1    | 2.2    | 5.7    | 4.6    | 6.7    |
| <b>A/ck/Saudi Arabia/A/2010</b>          | 4.3  | 1.1    | 1.9    | 2.1    | 2.0    | 2.0    | 6.2    | 5.4    | 7.7    |
| <b>A/ck/Saudi Arabia/S11A/2003</b>       | 1.9  | 3.0    | 4.2    | 4.5    | 4.2    | 4.2    | 5.8    | 2.4    | 4.2    |
| <b>A/ck/Saudi Arabia/3489V08-44/2006</b> | 4.1  | 0.7    | 1.4    | 1.6    | 1.5    | 1.6    | 5.7    | 5.5    | 7.7    |
| <b>A/ck/Saudi Arabia/3489V08-47/2007</b> | 4.8  | 2.3    | 3.4    | 3.5    | 3.4    | 3.5    | 7.4    | 4.7    | 7.4    |
| <b>A/ck/Saudi Arabia/3489V08-50/2008</b> | 4.0  | 0.6    | 1.3    | 1.5    | 1.3    | 1.4    | 5.5    | 5.6    | 7.7    |
| <b>A/ck/Saudi Arabia/3489V08/2005</b>    | 4.5  | 2.2    | 3.3    | 3.4    | 3.3    | 3.4    | 7.2    | 4.4    | 7.1    |
| <b>A/ck/Shijiazhuang/2/1999</b>          | 3.8  | 4.4    | 5.7    | 6.0    | 5.7    | 5.8    | 7.8    | 1.0    | 4.0    |

|                                            |     |     |     |     |     |     |     |     |     |
|--------------------------------------------|-----|-----|-----|-----|-----|-----|-----|-----|-----|
| <b>A/ck/Sichuan/5/1997</b>                 | 5.1 | 4.4 | 5.7 | 5.9 | 5.7 | 5.8 | 8.8 | 2.8 | 5.8 |
| <b>A/ck/Tunisia/12/2010</b>                | 3.5 | 1.1 | 2.2 | 2.4 | 2.4 | 2.3 | 5.6 | 6.9 | 8.2 |
| <b>A/ck/Tunisia/812/2012</b>               | 3.7 | 1   | 2.2 | 2.4 | 2.2 | 2.3 | 6.0 | 4.7 | 7.0 |
| <b>A/ck/United Arab Emirates/H4TR/2011</b> | 5.7 | 3.3 | 4.3 | 4.4 | 4.3 | 4.4 | 8.4 | 5.0 | 7.9 |
| <b>A/ma/Finland/LI13384/2010c</b>          | 2.0 | 4.9 | 5.9 | 6.2 | 5.9 | 5.9 | 5.9 | 2.7 | 2.4 |
| <b>A/dk/Hong Kong/702/1979</b>             | 5.3 | 6.0 | 7.3 | 7.6 | 7.4 | 7.4 | 9.4 | 1.4 | 4.0 |
| <b>A/dk/Hong Kong/Y280/1997</b>            | 3.5 | 0.7 | 0.7 | 1.0 | 0.7 | 0.7 | 4.5 | 5.8 | 7.5 |
| <b>A/dk/Hunan/1/2006</b>                   | 5.1 | 2.4 | 1.1 | 0.8 | 1.1 | 1.1 | 4.9 | 7.6 | 9.4 |
| <b>A/ph/Republic of Ireland/PV18/1997</b>  | 3.7 | 5.2 | 6.5 | 6.7 | 6.5 | 6.5 | 7.8 | 0.3 | 2.8 |
| <b>A/qa/Arkansas/29209/1993</b>            | 2.8 | 4.8 | 5.9 | 6.2 | 5.9 | 5.9 | 6.8 | 1.3 | 2.5 |
| <b>A/qa/Hong Kong/A28945/88</b>            | 3.7 | 4.6 | 4.9 | 5.1 | 4.8 | 4.8 | 4.9 | 2.4 | 3.6 |
| <b>A/qa/Hong Kong/G1/1997</b>              | 0.7 | 3.7 | 4.5 | 4.8 | 4.5 | 4.5 | 4.8 | 3.3 | 3.8 |
| <b>A/qa/United Arab Emirates/302/2001</b>  | 2.1 | 2.1 | 3.3 | 3.6 | 3.3 | 3.3 | 5.5 | 3.3 | 5.1 |
| <b>A/rt/New Jersey/AI11-1946/2011</b>      | 3.6 | 4.4 | 5.7 | 5.9 | 5.7 | 5.7 | 7.6 | 0.9 | 3.8 |
| <b>A/sh/Delaware/277/1999</b>              | 3.7 | 5.2 | 6.5 | 6.7 | 6.5 | 6.5 | 7.8 | 0.5 | 2.6 |
| <b>A/sh/Delaware/9/1996</b>                | 3.8 | 6.3 | 7.4 | 7.7 | 7.4 | 7.4 | 7.7 | 2.1 | 1.0 |
| <b>A/ty/Israel/1266/2003</b>               | 3.6 | 2.3 | 3.5 | 3.8 | 3.5 | 3.6 | 6.7 | 3.4 | 5.9 |
| <b>A/ty/Netherlands/11015452/2012</b>      | 2.5 | 5.7 | 6.6 | 6.9 | 6.6 | 6.6 | 5.7 | 3.7 | 2.4 |
| <b>A/tk/USA/6707-1/1996</b>                | 3.1 | 5.1 | 6.3 | 6.6 | 6.3 | 6.3 | 7.2 | 1.2 | 2.2 |



**Table 4.** Summary of amino acid substitutions for each mutant and antigenic distances

| Mutant          | Substitution                                                 | Virus        | Antigenic distance from |               | Antigenic cluster        |
|-----------------|--------------------------------------------------------------|--------------|-------------------------|---------------|--------------------------|
|                 |                                                              |              | WF10                    | h9.4.2        |                          |
| WF10 (H9N2)     | Wild type                                                    | YES          | 0.0                     | 3.4           | <i>cyan</i>              |
| h9.4.2          | HA1                                                          | YES          | 3.4                     | 0.0           | <i>blue</i>              |
| WF10-9p-h9.4.2  | E72G, R131K, G135D, F150L, E180A, I186T, N188T, D198N, Q217I | YES          | 3.8                     | 1.6           | <i>blue</i>              |
| h9.4.2-9p-WF10  | G72E, K131R, D135G, L150F, A180E, T186I, T188N, N198D, I217Q | YES          | 0.7                     | 3.2           | <i>cyan</i>              |
| 131-h9.4.2      | R131K                                                        | YES          | 0.6                     | 3.7           | <i>cyan</i>              |
| 150-h9.4.2      | F150L                                                        | YES          | 1.7                     | 4.9           | <i>cyan</i>              |
| 180-h9.4.2      | E180A                                                        | YES          | 2.2                     | 2.8           | <i>blue/cyan</i>         |
| 217-h9.4.2      | Q217I                                                        | YES          | 0.7                     | 3.5           | <i>cyan</i>              |
| 131-180-h9.4.2  | R131K/E180A                                                  | YES          | 1.1                     | 2.3           | <i>blue/cyan</i>         |
| 150-180-h9.4.2  | F150L/E180A                                                  | NO           | -                       | -             | -                        |
| 150-217-h9.4.2  | F150L/Q217I                                                  | YES          | 1.7                     | 4.5           | <i>cyan</i>              |
| 180-217-h9.4.2  | E180A/Q217I                                                  | NO           | -                       | -             | -                        |
|                 | <b>Substitution</b>                                          | <b>Virus</b> | <b>WF10</b>             | <b>h9.3.9</b> | <b>Antigenic cluster</b> |
| h9.3.9          | HA1                                                          | YES          | 4.1                     | 0.0           | <i>orange</i>            |
| WF10-7p-h9.3.9a | T127D, R131K, V173M, E180T, T182R, N183D, Q217M              | YES          | 5.0                     | 0.9           | <i>orange</i>            |
| WF10-7p-h9.3.9b | T127D, R131K, Q146R, E180T, T182R, N183D, Q217M              | YES          | 5.1                     | 1.0           | <i>orange</i>            |
| h9.3.9-8p-WF10  | D127T, K131R, R146Q, M173V, T180E, R182T, D183N, M217Q       | YES          | 1.3                     | 3.6           | <i>cyan</i>              |
| 150-h9.3.9      | F150D                                                        | YES          | 1.3                     | 4.5           | <i>cyan</i>              |
| 180-h9.3.9      | E180T                                                        | NO           | -                       | -             | -                        |
| 217-h9.3.9      | Q217M                                                        | YES          | 1.0                     | 4.9           | <i>cyan</i>              |
| 150-180-h9.3.9  | F150D/E180T                                                  | YES          | 0.7                     | 4.0           | <i>cyan</i>              |
| 150-217-h9.3.9  | F150D/Q217M                                                  | YES          | 0.6                     | 3.5           | <i>cyan</i>              |
| 180-217-h9.3.9  | E180T/Q217M                                                  | YES          | 0.7                     | 4.3           | <i>cyan</i>              |
|                 | <b>Substitution</b>                                          | <b>Virus</b> | <b>WF10</b>             | <b>h9.3.5</b> | <b>Antigenic cluster</b> |
| h9.3.5          | HA1                                                          | YES          | 4.1                     | 0.0           | <i>blue</i>              |

|                |             |     |     |     |                    |
|----------------|-------------|-----|-----|-----|--------------------|
| 149-h9.3.5     | G149N       | YES | 1.5 | 5.6 | <i><b>cyan</b></i> |
| 150-h9.3.5     | F150A       | YES | 1.7 | 5.7 | <i><b>cyan</b></i> |
| 180-h9.3.5     |             | YES | 1.3 | 4.2 | <i><b>cyan</b></i> |
| 149-150-h9.3.5 | G149N/F150A | YES | 1.5 | 5.6 | <i><b>cyan</b></i> |

1 **Table 5.** Antigenic distances between consensus viruses and the different mutants.  
2

|                | WF10 | h9.4.2 | h9.3.3 | h9.3.4 | h9.3.5 | h9.3.7 | h9.3.9 | h9.1.1 | h9.2.2 |
|----------------|------|--------|--------|--------|--------|--------|--------|--------|--------|
| 131-180-4.2    | 1.1  | 2.3    | 3.0    | 3.3    | 3.0    | 3.0    | 4.0    | 4.3    | 5.3    |
| 131-4.2        | 0.6  | 3.7    | 4.2    | 4.5    | 4.2    | 4.2    | 3.6    | 4.6    | 4.8    |
| 149-150-H9.3.5 | 1.5  | 4.9    | 5.7    | 5.9    | 5.6    | 5.6    | 4.8    | 3.9    | 3.3    |
| 149-H9.3.5     | 1.5  | 4.9    | 5.6    | 5.8    | 5.6    | 5.5    | 4.5    | 4.3    | 3.7    |
| 150-180-3.9    | 0.7  | 4.1    | 4.8    | 5.0    | 4.7    | 4.7    | 4.0    | 4.2    | 4.2    |
| 150-217-3.9    | 0.6  | 3.5    | 4.0    | 4.3    | 4.0    | 4.0    | 3.5    | 4.6    | 4.9    |
| 150-217-4.2    | 1.7  | 4.5    | 5.5    | 5.8    | 5.5    | 5.5    | 5.7    | 2.6    | 2.8    |
| 150-H9.3.5     | 1.7  | 4.9    | 5.8    | 6.0    | 5.7    | 5.7    | 5.2    | 3.6    | 3.0    |
| 150-H9.3.9     | 1.3  | 4.6    | 5.4    | 5.6    | 5.3    | 5.3    | 4.5    | 4.0    | 3.6    |
| 150-H9.4.2     | 1.7  | 4.9    | 5.8    | 6.0    | 5.8    | 5.7    | 5.3    | 3.4    | 2.9    |
| 180-217-3.9    | 0.7  | 4.1    | 4.8    | 5.0    | 5.1    | 4.8    | 4.8    | 4.3    | 4.0    |
| 180-H9.3.5     | 1.3  | 3.2    | 4.2    | 4.5    | 4.2    | 4.2    | 5.3    | 2.8    | 4.0    |
| 180-H9.4.2     | 2.2  | 2.8    | 4.1    | 4.3    | 4.1    | 4.1    | 6.0    | 2.5    | 4.5    |
| 217-3.9        | 1.0  | 4.1    | 5.0    | 5.3    | 5.0    | 5.0    | 4.9    | 3.3    | 3.5    |
| 217-4.2        | 0.7  | 3.5    | 4.4    | 4.7    | 4.4    | 4.4    | 4.8    | 3.3    | 3.9    |
| 3.9-8PWF10     | 1.3  | 4.5    | 5.0    | 5.2    | 4.9    | 4.9    | 3.6    | 4.8    | 4.5    |
| 4.2-9PWF10     | 0.7  | 3.2    | 3.7    | 4.0    | 3.7    | 3.6    | 3.5    | 4.6    | 5.1    |
| WF10-7P-3.9 C3 | 5.0  | 5.9    | 5.4    | 5.4    | 5.4    | 5.3    | 0.9    | 8.9    | 8.8    |
| WF10-7P-3.9 C4 | 5.1  | 6.0    | 5.4    | 5.4    | 5.4    | 5.3    | 1.0    | 9.0    | 8.9    |
| WF10-9P-H9.4.2 | 3.8  | 1.6    | 2.8    | 3.0    | 2.9    | 2.9    | 6.5    | 4.2    | 6.6    |

3

4
